# Supplementary material
Source: PubMed Central journal article supplement (PMC6094097)
Supplement: pnas.1806110115.sapp.pdf [file pnas.1806110115.sapp.pdf]

## Supplementary Information for

### **Identifying a large number of high-yield genes in rice by pedigree analysis, whole genome sequencing and CRISPR-Cas9 gene knockout**

Ju Huang<sup>a,1</sup>, Jing Li<sup>a,1</sup>, Jun Zhou<sup>b</sup>, Long Wang<sup>a</sup>, Sihai Yang<sup>a</sup>, Laurence D. Hurst<sup>c,2</sup>, Wen-Hsiung Li<sup>d,e,2</sup>, Dacheng Tian<sup>a,2</sup>

<sup>a</sup>State Key Laboratory of Pharmaceutical Biotechnology, School of Life Sciences, Nanjing University, Nanjing 210023, China; <sup>b</sup>Department of Organismic and Evolutionary Biology, Harvard University, Cambridge, Massachusetts, USA; <sup>c</sup>Department of Biology and Biochemistry, University of Bath, Bath, U.K, BA2 7AY ; <sup>d</sup>Biodiversity Research Center, Academia Sinica, Taipei 115, Taiwan; <sup>e</sup>Department of Ecology and Evolution, University of Chicago, Chicago, IL 60637

<sup>1</sup>J.H. and J. L. contributed equally to this work.

<sup>2</sup>To whom correspondence should be addressed. E-mail: whli@uchicago.edu (W-H. L.)  
dtian@nju.edu.cn (D. T.) or bssldh@bath.ac.uk (L.D.H.)

#### **This PDF file includes:**

Supplementary text  
Figs. S1 to S8  
Tables S1 to S17  
References for SI reference citations

#### **Other supplementary materials for this manuscript include the following:**

Datasets S1 to S2

## Supplementary Information Text

### SI Materials and Methods

#### Read mapping and variant calling

The paired-end reads of all the rice accessions were aligned against the Nipponbare reference (IRGSP-1.0) using Stampy (1) and BWA (2) to speed up mapping. The mapping results were then processed according to the GATK best practice (3, 4) to cleanup over-sequenced DNA molecules and false positive variants due to mapping artifacts.

Joint SNP calling and genotyping of all sequenced samples was performed using the GATK UnifiedGenotyper package, with a minimum requirement of 20 for the score of mapping quality and 50 for the minimum threshold to make a confident call. To ensure the accuracy of genotyping for each sample, we used the following criteria: i) the sample should be covered by at least 5 reads but no more than 60 reads; ii) the genotype quality should be  $\geq 20$ ; iii) excluding heterozygous genotypes (in a selfed rice plant the heterozygous alleles are likely to have resulted from non-allelic sequence alignments, caused by copy number variations or translocated segments). At the end, a total of 5,206,873 SNPs across all sequenced samples were called and used to estimate diversities among samples or groups.

On the other hand, 677,992 and 541,778 SNPs were called in the two parent-offspring trios, i.e., the starting trio of DGWG-Peta-IR8 and the terminal trio of IR30-Gui630-MH63 (Fig. 1), so that we could ensure the accuracy of the pedigree analysis (see *SI Appendix*, Fig. S4 for details). After that, more stringent filtering steps were implemented to obtain the quality markers used in pedigree analysis: i) clear bi-allelic SNPs in at least half of all the samples; ii) excluding SNPs in annotated transposable element regions; and iii) excluding SNPs that only appeared in a single sample. Finally, 592,603 and 481,385 high-quality SNP markers in the trios of

DGWG-Peta-IR8 and IR30-Gui630-MH63, respectively, were used for block inference and inheritance analysis (*SI Appendix*, Fig. S4 and Dataset S1).

### **Block inference and inheritance analysis**

The ancestral status of the SNP markers in IR8 and MH63 can be determined by analyzing the two sets of trios (5). Therefore, merging consecutive markers with the same ancestral genotype allowed the identification of initial blocks. Briefly, blocks with at least 15 markers and longer than 10 kb were used as seeds, each of which was used to extend itself to the nearest block of another ancestral type. However, in a few inferred blocks, regions with limited reliable markers (defined as  $<1$  marker in 10-kb region) or regions with a high density of markers (e.g.,  $\geq 5$  markers clustered within a 100-bp segment) between its two ancestral genotypes were excluded because such blocks could result in potential errors in inferring blocks possibly owing to misalignment. Some paradoxical markers were observed in a few inferred blocks, which might be caused by gene conversion (*SI Appendix*, Fig. S9) or heterozygous sites in the ancestors. In such cases, only those blocks that have at least 75% of markers inferred to one of its parental genotypes (the ratio of markers in one genotype to the other was at least 3:1) were retained. Finally, all borders in those blocks were manually checked and confirmed.

Subsequently, the candidate blocks in MH63 that were inferred to be inherited from IR30 were further compared with the ancestors IR24, IR8, DGWG and Peta to identify their inheritance status. The blocks of MH63 inherited from DGWG or Peta are expected to have the same genotypes as those of its pedigree ancestors (e.g., IR8 and IR24) and at least 80% ancestral markers that can be detected in each generation.

### **Identification of recombination events**

Crossover events were identified through exchange of blocks of different ancestral types. Shorter blocks showed a higher risk of non-allelic sequence alignment caused by copy number variations, sequence rearrangements or translocated segments.

Therefore, the distribution of the block size was surveyed between two trio-sets and two pair-sets (IR8-IR24 and IR24-IR30). The comparisons revealed no statistical differences among large blocks (e.g.,  $\geq 400$  kb) (two sample  $t$ -test, P-value = 0.828), but significant differences among blocks smaller than 400 kb in size (two sample  $t$ -test, P-value  $< 0.001$ ). These results suggest that small blocks could be strongly affected by the methods used in block identification. Thus, when detecting crossover events, we only considered blocks larger than 400 kb (*SI Appendix*, Table S17).

### **Block inheritance probability calculation.**

MH63 has a proportion of 13.4% inherited from Peta (Fig. 1). So, for a single block in Peta, its probability to be inherited in MH63 is:

$$P(\textit{inherited}) = 13.4\%$$

Let  $p'$  be the probability that a block in MH63 was passed to all of the 8 descendants of MH63. Only those parts of MH63 derived from IR30 could contain the ancestor blocks of Peta or DGWG.  $p'$  could be calculated by multiplying the proportions of MH63 in the 8 descendants, which were inherited from IR30. Let  $p_1 \sim p_8$  be the proportions that MH63 descendants inherited from IR30. For example,  $p_1$  equals to 24.5% and so MH63 descendant CDR22 has 24.5% inherited from IR30. The details of other proportions are provided in *SI Appendix*, Table S4.  $p'$  could be calculated as:

$$\begin{aligned} p' &= \prod_{n=1}^8 p_n \\ &= 24.5\% \times 24.5\% \times 24.5\% \times 24.5\% \times 24.5\% \times 12.2\% \times 18.4\% \times 6.1\% \\ &= 1.21 \times 10^{-6} \end{aligned}$$

Thus, the probability that a block in Peta was shared by MH63 and all of its 8 descendants is:

$$P(\textit{shared}) = P(\textit{inherited}) \times p' = 13.4\% \times 1.21 \times 10^{-6} = 1.62 \times 10^{-7}$$

In fact, the total length of blocks from Peta shared by all 8 MH63 progenies is 8.76M, which constitute 2.4% of the 370M genome (*SI Appendix*, Table. S8). This is much higher than  $P(\textit{shared})$ , providing evidence of selection.

For a single block in DGWG,  $P(\textit{inherited}) = 3.9\%$ ,

$$P(\textit{shared}) = P(\textit{inherited}) \times p' = 4.72 \times 10^{-8}$$

The total length of blocks from DGWG shared by all 8 MH63 progenies is 6.72M, 1.82% of the genome (*SI Appendix*, Table. S8), which is also much higher than the corresponding  $P(\textit{shared})$ .

The extreme low probability for a block from DGWG or Peta to be shared by all 8 MH63 progenies could be proved in another way. Assume that one chromosome has  $n$  blocks derived from a certain ancestor (DGWG or Peta), each with a probability  $p$  to be present in MH63. Then, the probability of at least one block to be present in MH63 is

$$P(\textit{inherited}) = 1 - \sum_{i=0}^n C_n^i (p)^i (1-p)^{(n-i)}$$

Let  $p'$  be the probability a block in MH63 be passed to all of the 8 descendants of MH63:

$$p' = 1.21 \times 10^{-6}$$

Then  $P(\textit{shared})$ , the probability that at least one block in IR8 derived from either DGWG or Peta is retained in all 8 MH63 descendants is

$$P(\textit{shared}) = P(\textit{inherited}) \times p'$$

For example, chromosome 3 contains the largest number of 17 ( $n$ ) Peta blocks, each of which has  $p = 13.4\%$  to be present in MH63 and  $p' = 1.21 \times 10^{-6}$  to be in all of the 8 MH63 descendants (Fig. 1A and *SI Appendix*, Table. S4). Thus, the largest probability that chromosome 3 has one or more Peta blocks in MH63 and in all of its 8 descendants is:

$$P(\textit{shared}) = (1 - C_{17}^0 (p)^0 (1-p)^{(17-0)}) \times 1.21 \times 10^{-6} = 1.11 \times 10^{-6}$$

For a DGWG block,  $p = 3.9\%$ .

$$P(\textit{shared}) = (1 - C_{17}^0 (p)^0 (1-p)^{(17-0)}) \times 1.21 \times 10^{-6} = 5.95 \times 10^{-7}$$

These probabilities indicate that there should be virtually no chance to have one or more DGWG or Peta blocks in any chromosome in OLP in the absence of selection.

## **Identification of selectively targeted gene loci in ancestral blocks of DGWG and Peta**

As shown in Fig. 1B, we first identified gene loci stably inherited from DGWG and Peta to MH63 and all of its eight descendants. Second,  $\pi$  (polymorphic sites/informative sites) was calculated for each 10-kb window to compare the shared regions to the corresponding regions in the other five collateral varieties, namely, 9311, IR1544, SH527, IR36 and IR26. When the corresponding regions are also derived from Peta or DGWG, the diversity in these regions is expected to be zero or very low. (When a cultivar experienced many crosses with different parents, gene conversion could occur; or different cultivars from the same parents could have a few sequence differences, e.g., the IR26 and a sister line of UPR221, a parent of IR30 in Fig. 1A, were derived from the same F3 plant but 1/8 of the time a heterozygous site are expected to be different in the descendants). To identify the gene loci that were subjected to strong directional selection, which was also applied to the collateral varieties, we required a diversity value  $<0.0001$  (about 1/50 of the average diversity among landraces (6)) and that at least 3 collaterals had identical alleles.

Third, 8 tall rice landraces and 1 wild rice variety in addition to 10 wild rice varieties from a previous study (6) (a detailed list in *SI Appendix*, Table S1) were used to exclude the non-targeted genes. With the genes sorted by  $\pi$  values, we first removed the bottom 50% of genes with lower  $\pi$  values compared to wild cultivars and then filtered out the bottom 50% with lower  $\pi$  values compared to tall cultivars. Only those genes with low divergence values within groups (e.g., high-yielding and similar height), but high divergence compared to the tall landraces or wild rice, were retained.

The genes identified by our criteria above were under strong artificial selection during the breeding process. However, if two or more genes overlap completely or partly within the same locus, our criteria cannot determine which one was the target gene. For this reason, genes are defined as gene loci, in which the two members of an overlapping pair are counted as one locus. As a consequence, the final list of genes

identified in Fig. 1B is 159 genes from the 129 gene loci, which include 28 loci with two or more overlapping genes.

### **Construction of CRISPR/dCas9 Vectors and target gene loci knockdown**

We cloned dCas9:BRD block from pEGB 35s:dCas:BRD:tNos (addgene No.75401)(7) and replace Cas9 on pRGEB31 to construct permanent dCas9 knockdown plasmid. For each target locus, gRNAs were designed to target specific sites and a pair of DNA oligonucleotides with appropriate cloning linkers were synthesized (BGI, Inc). Each pair of oligonucleotides were phosphorylated, annealed, and then ligated into BsaI-digested dCas9 knockdown plasmid. Then knock-down plasmids were transformed in the same way as knockout plasmids. Japonica cultivar, Taipei, was used as the background.

### **RNA extraction and QPCR**

Plant RNA extraction and reverse transcription were carried out with minibest universal RNA extraction kit (TAKARA) following the manual. QPCR was done with SYBR Green qPCR Master Mix(TAKARA) on Step-One Plus Real-time system(ABI)

### **Yield-related genes enrichment calculation**

The information of 1051 reported functional genes was downloaded from Q-TARO (<http://qtaro.abr.affrc.go.jp>). Under the definition that morphological traits and physiological traits are yield-related, there are 554 reported yield related genes among the 37869 genes in the rice genome. Based on this ratio (1.5%), 2.33 reported genes are expected among the 159 genes we identified (contained in 129 gene loci). However, we find 6 reported genes ( $p=0.077$ ,  $\chi^2=3.11$ ,  $df=1$ , Chi-squared test with Yate's correction). In addition, we also find 15 genes in knockout experiments and 10 in knockdown experiments that control phenotypic changes, adding up to 31 genes in total. This means that there are significantly more yield related genes in the genes we identified than expected ( $p<0.001$ ,  $\chi^2=334$ ,  $df=1$ , Chi-squared test with Yate's correction).

## SI References

1. Lunter G, Goodson M (2010) Stampy: A statistical algorithm for sensitive and fast mapping of Illumina sequence reads. *Genome Res* 21:936–939.
2. Li H, Durbin R (2009) Fast and accurate short read alignment with Burrows-Wheeler transform. *Bioinformatics* 25(14):1754–1760.
3. DePristo MA, et al. (2011) A framework for variation discovery and genotyping using next-generation DNA sequencing data. *Nat Genet* 43(5):491–498.
4. McKenna A, et al. (2010) The Genome Analysis Toolkit: A MapReduce framework for analyzing next-generation DNA sequencing data. *Genome Res* 20(9):1297–1303.
5. Conrad DF, et al. (2011) Variation in genome-wide mutation rates within and between human families. *Nat Genet* 43(7):712–714.
6. Xu X, et al. (2011) Resequencing 50 accessions of cultivated and wild rice yields markers for identifying agronomically important genes. *Nat Biotechnol* 30(1):105–111.
7. Vazquez-Vilar M, et al. (2016) A modular toolbox for gRNA–Cas9 genome engineering in plants based on the GoldenBraid standard. *Plant Methods* 12. doi:10.1186/s13007-016-0101-2.



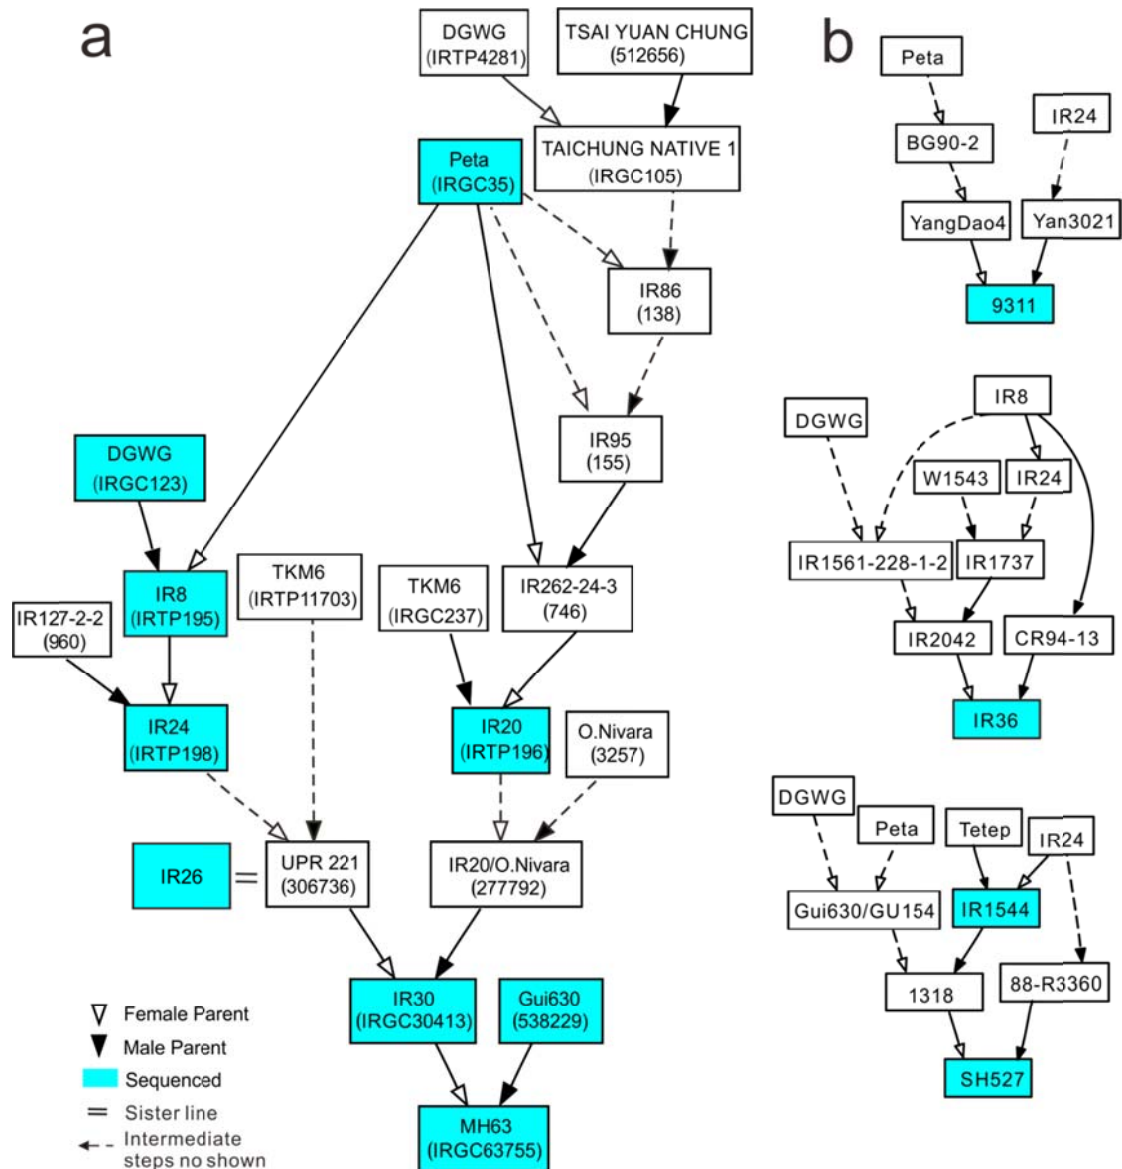

**Fig. S1. Pedigree maps of the cultivars used in this study. a)** The full pedigree of the major cultivars used. **b)** Brief pedigrees of 4 collateral cultivars. Data from IRRI germplasm pedigree (<http://www.iris.irri.org/germplasm/>) and CNRRI (<http://www.ricedata.cn/variety/index.htm>). The solid arrow denotes a direct parent and the dotted arrow indicates an indirect ancestor.

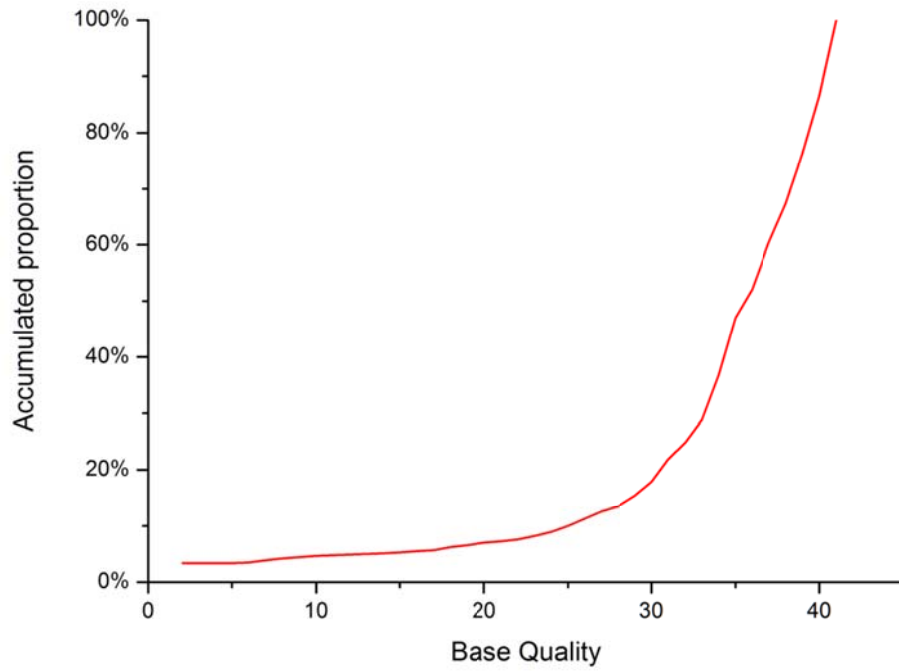

**Fig. S2. Quality score distribution of all bases in sequencing reads.** The y-axis is the accumulated proportion of all bases. The red line indicates the proportion of bases with phred quality lower than a given value (x-axis). More than 90% bases have phred quality score greater than 25, indicating high sequencing quality of our re-sequencing data.

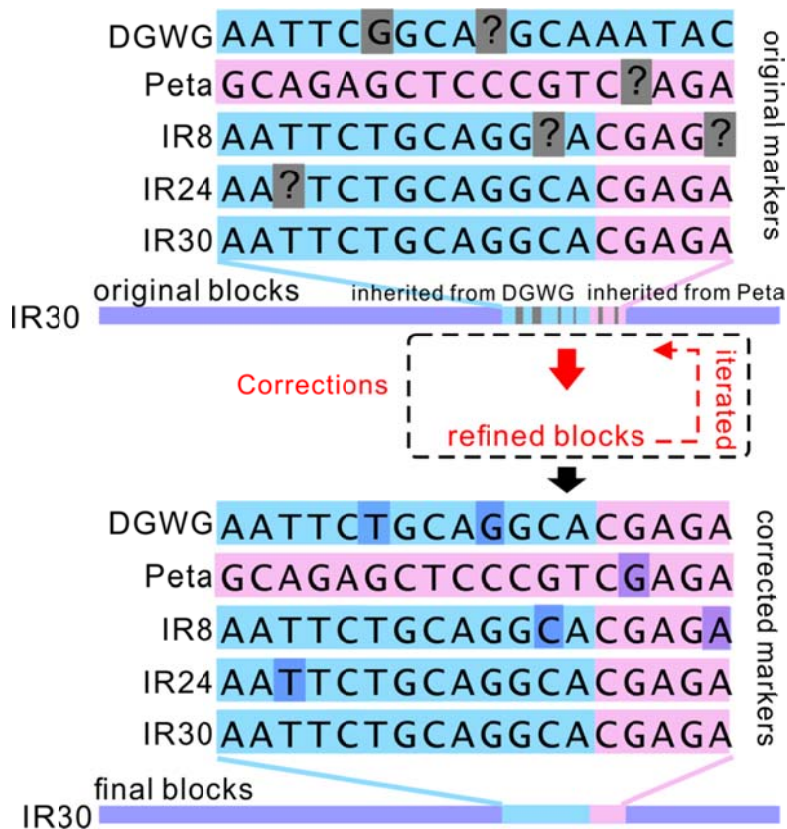

**Fig. S3. Brief workflow of ancestral markers correction and ancestral blocks refinement using pedigree information.** The gray question marks show that those SNPs failed in read calling or have low quality which could not pass the previous filtering steps. The gray shaded SNPs are the ones that might have a difference between the original cultivar and the current sequenced one. Through these refinement steps, 5714 markers can be inferred or corrected and added to the DGWG-Peta-IR8 trio (Dataset 2); these markers were previously not identified as markers due to their low quality, uncalled, heterozygous genotypes or difference from the original cultivar used. Iteration of these correction steps could further identify reliable and useful markers, which could be used in other analysis. For example, we could verify the gray question marks and infer the missing SNPs by comparing the sequences of the ancestor (X) and descendants IR8, IR24, and IR30. More specifically, the gray SNP “G” in the DGWG block represents an unknown genotype that is possibly a within-cultivar polymorphism between the original cultivar and the current sequenced one. However, it could be corrected to a “T” based on the allelic sequences of Peta and its descendants. Similarly, we could also infer more accurate SNPs or missing SNPs in descendant blocks based on the sequences of the ancestor and other descendants. In addition, we could improve the accuracy of the SNPs or other variant [e.g., insertions/deletions (indels)] calls, and more accurately discriminated blocks from either ancestor.

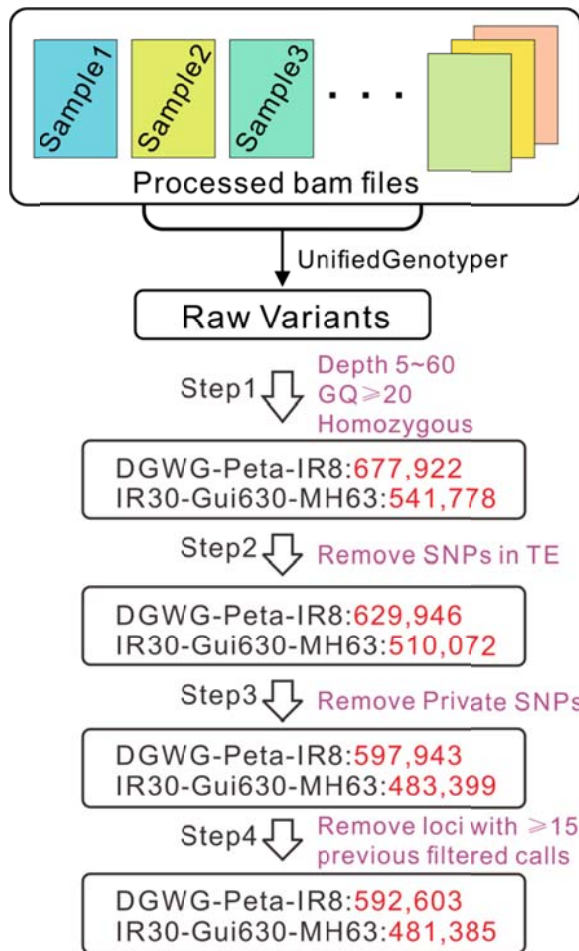

**Fig. S4. Flowchart of variant filtering and marker preparation for two trios.**



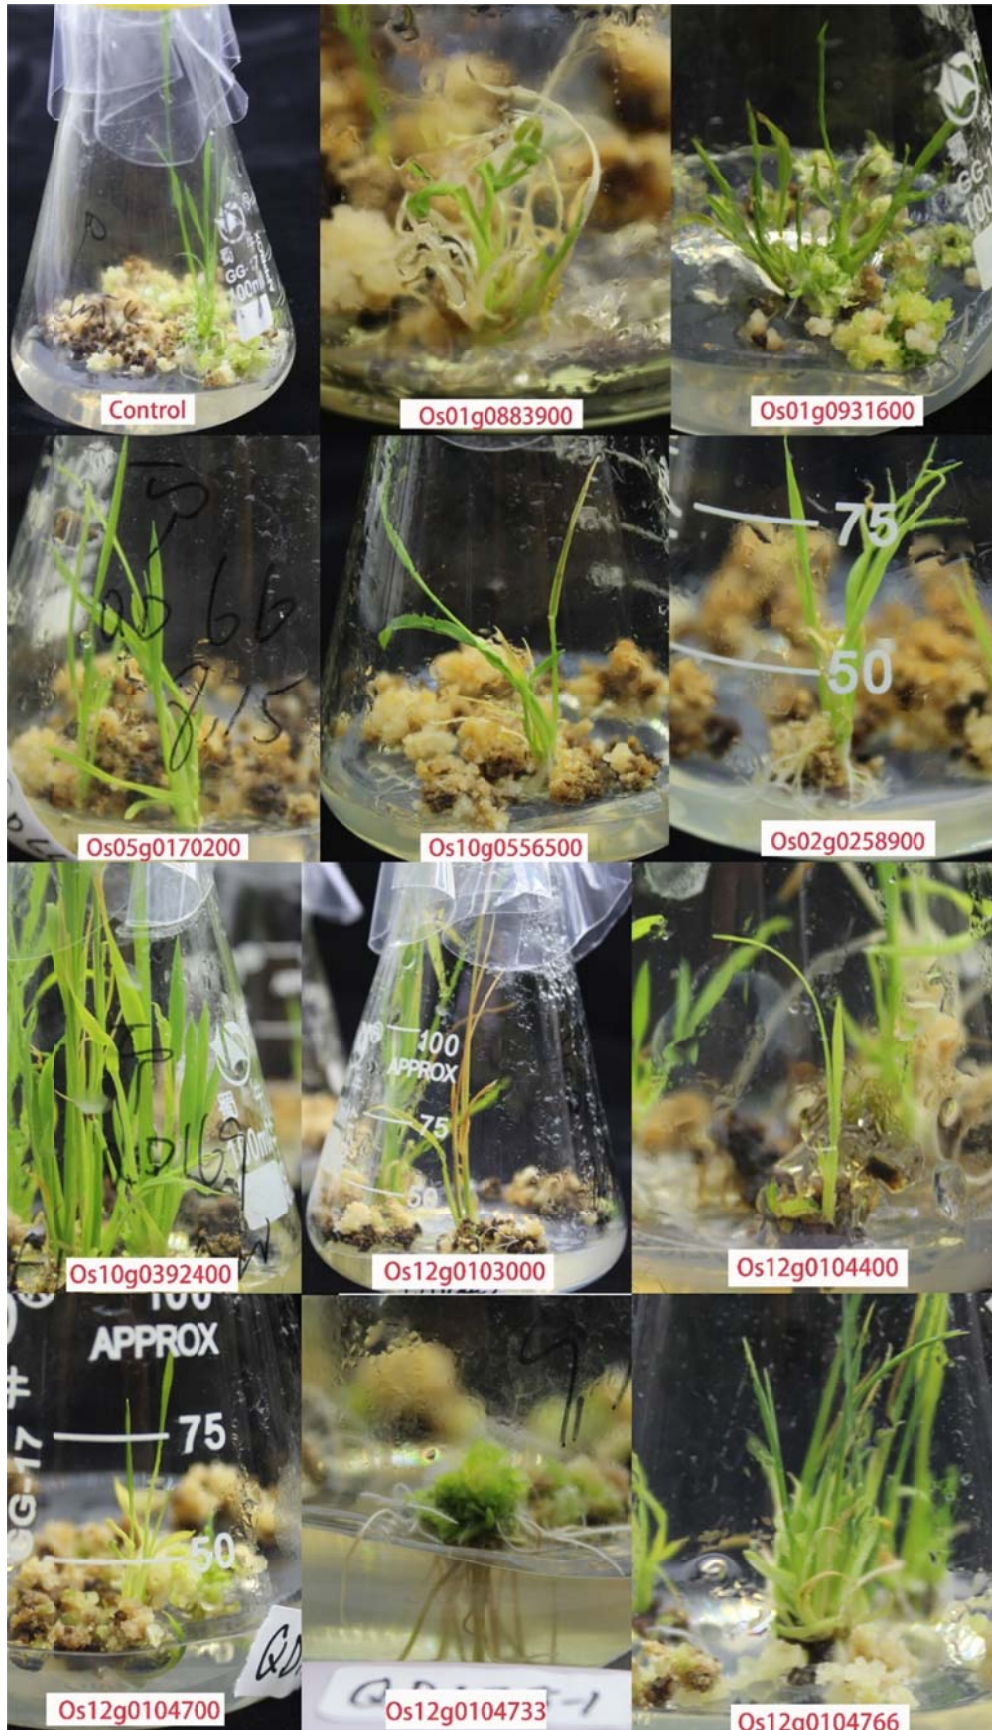

**Fig. S5** Phenotypic changes of knockdown transformants

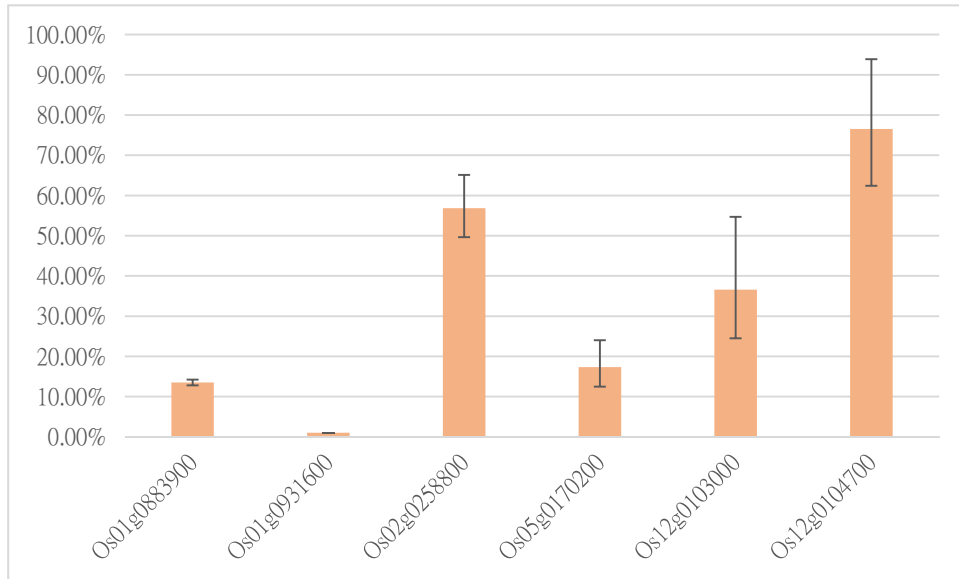

**Fig. S6.** Relative expression levels of 6 knockdown loci

Among the 10 knockdown genes, which exhibited distinctly phenotypic changes, only 6 had enough leaves for RNA extraction to test their relative expression levels compared with their respective wild type. Each of them showed a relative lower expression level than in the wild type, ranging from 0% to 80%.

We used pEGB 35s:dCas:BRD:tNos(GB1172) to knockdown expression, which was a gift from Diego Orzaez (Addgene plasmid # 75401). They found expression levels ranging from 20% to 100% in transformants. But we did not test the knockdown efficiency on many different genes. One of our knocked-down loci, Os01g0931600, showed an extremely low relative expression level,  $3 \times 10^{-7}\%$  of the wild type. The knockdown transformants showed severe phenotypic changes.

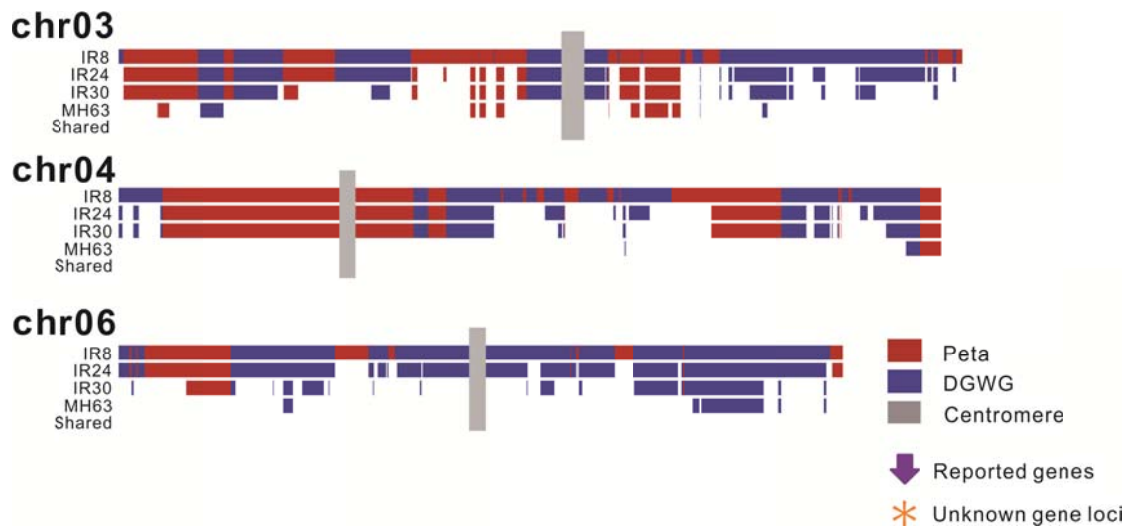

**Fig. S7.** Blocks inherited from DGWG and Peta in IR8, IR24, IR30, MH63 and the 8 descendants of MH63 on Chromosomes 3, 4 and 6.



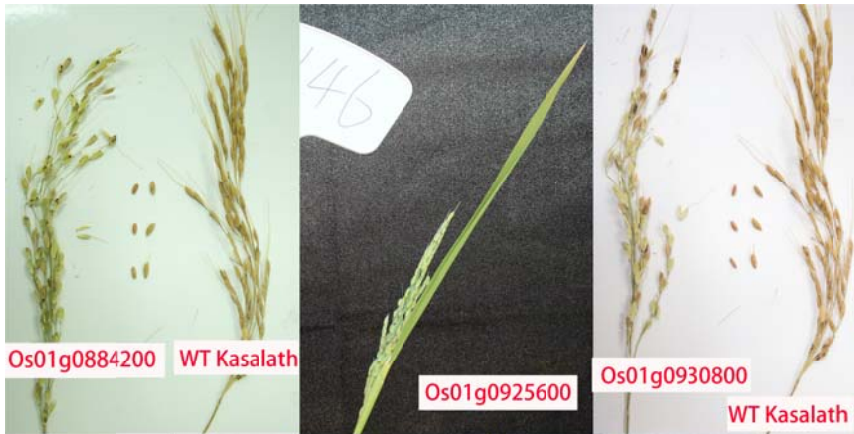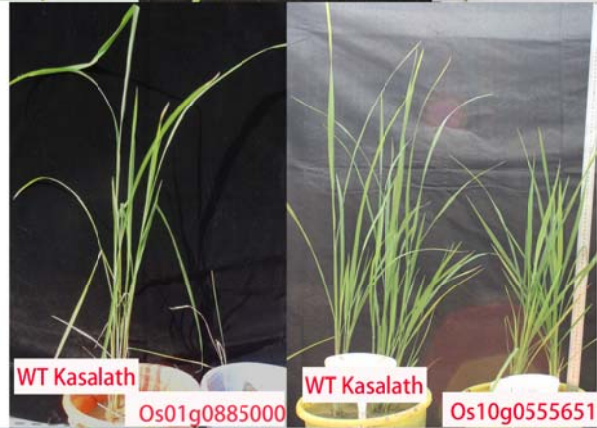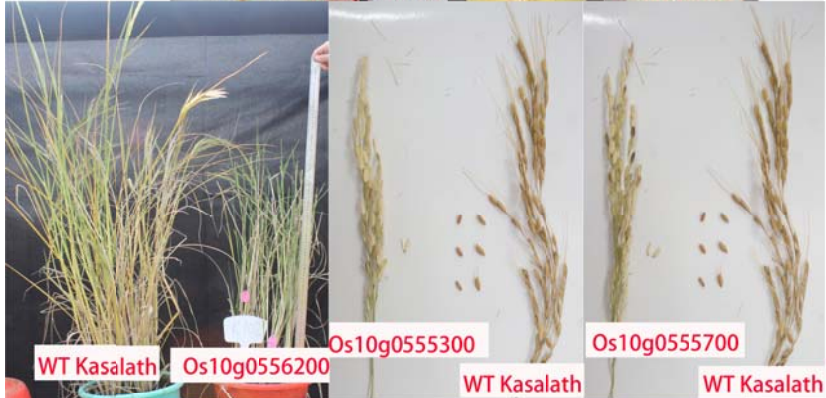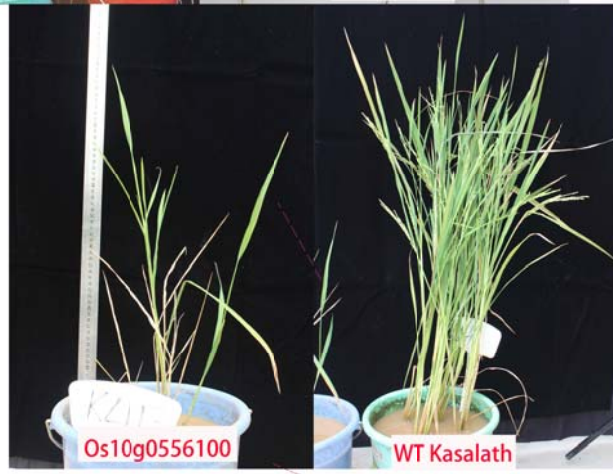



b

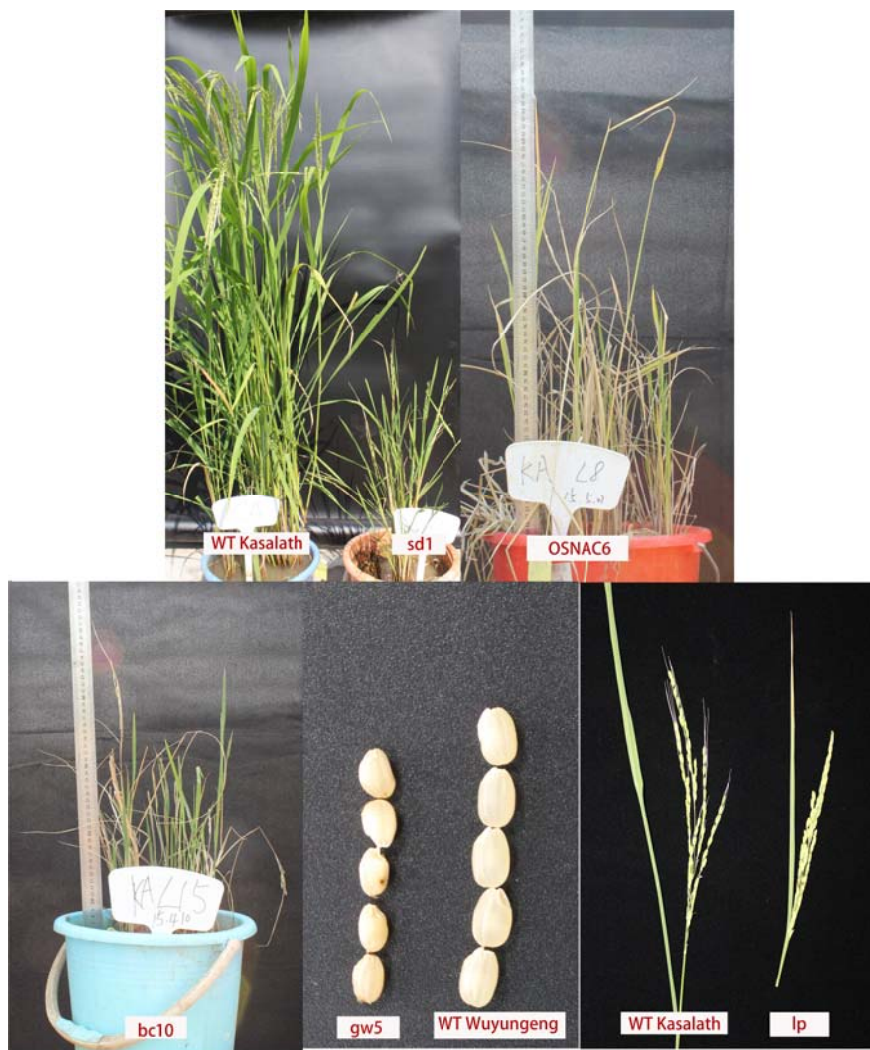

c

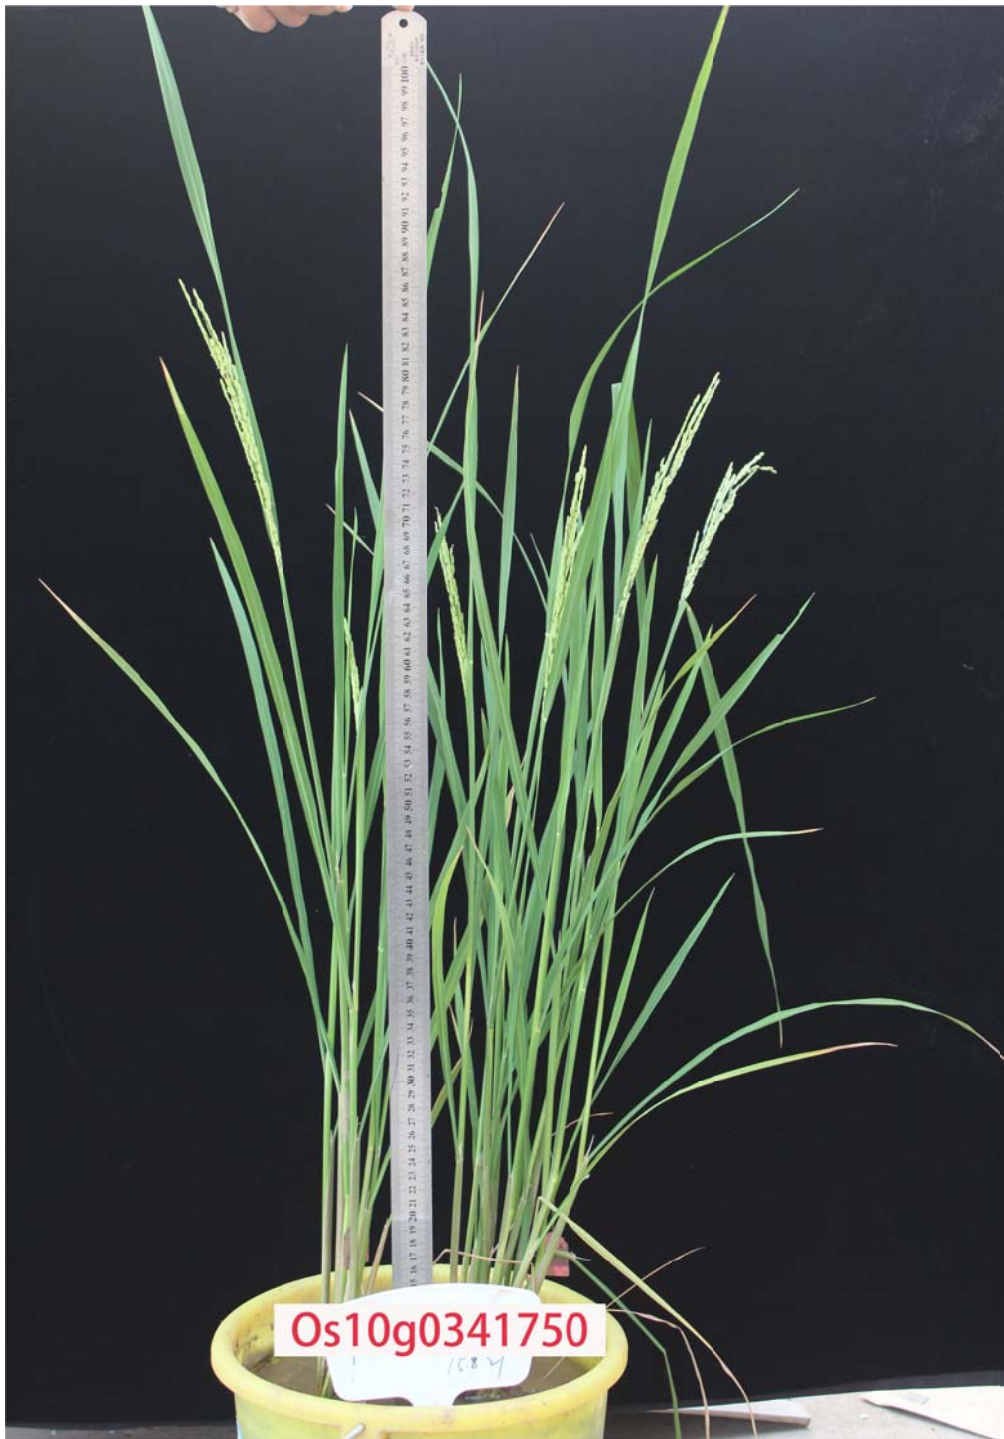

Fig.

**S8. Additional mutant pictures of target gene loci in positive and negative controls.** A) 9 knockout mutants of target gene loci; B) 4 positive controls showed mutant phenotypes similar to those reported previously; C) negative controls showed no significant changes in knockout mutants compared with the wild type, and so only one example is shown here.

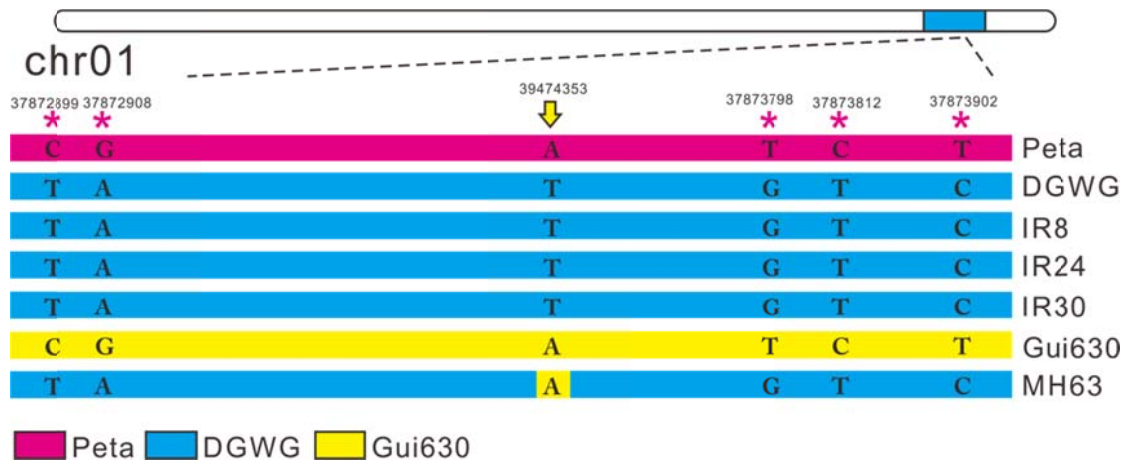

**Fig. S9. Graphic representation of a gene conversion event in which a Gui630 block was introduced into MH63 within a background of DGWG in chromosome 1.** A total of 2,358 markers from the IR30-Gui630-MH63 trio were identified in this background block (2,646,745bp). Sequences were colored by the inherited source of its ancestral parent. The position of the converted marker was marked by a yellow arrow. This converted SNP A was maintained in 7 descendants of MH63. Polymorphism markers used to denote the DGWG background were marked with pink asterisks.

**Table S1. Summary of rice cultivars sequenced.**

| Sample No. | Sample Name     | Sample ID | Source | Group       | Total reads | Raw read depth <sup>a</sup> | Genome     |                             |                                                | Gene Regions |                             |                                                |
|------------|-----------------|-----------|--------|-------------|-------------|-----------------------------|------------|-----------------------------|------------------------------------------------|--------------|-----------------------------|------------------------------------------------|
|            |                 |           |        |             |             |                             | Mean Depth | Coverage (All mapped reads) | Coverage (Reliable mapped reads <sup>b</sup> ) | Mean Depth   | Coverage (All mapped reads) | Coverage (Reliable mapped reads <sup>b</sup> ) |
| 1          | Pitai           | Peta      | IRRI   | Major       | 87,258,474  | 23.4                        | 21.5       | 88.4                        | 75.8                                           | 19.6         | 90.2                        | 86.6                                           |
| 2          | Dee geo woo gen | DGWG      | IRRI   | Major       | 90,508,600  | 24.2                        | 22.4       | 89.2                        | 76.7                                           | 19.0         | 90.9                        | 87.4                                           |
| 3          | IR8             | IR8       | CNRRI  | Major       | 87,726,432  | 23.5                        | 21.6       | 88.3                        | 75.9                                           | 19.1         | 90.0                        | 86.6                                           |
| 4          | IR24            | IR24      | CNRRI  | Major       | 93,843,410  | 25.1                        | 23.5       | 89.6                        | 77.9                                           | 23.1         | 92.2                        | 88.9                                           |
| 5          | IR20            | IR20      | IRRI   | Major       | 92,335,680  | 24.7                        | 22.3       | 89.2                        | 76.4                                           | 20.2         | 91.6                        | 87.8                                           |
| 6          | IR26            | IR26      | CNRRI  | Major       | 93,155,880  | 25.0                        | 23.2       | 90.0                        | 78.5                                           | 22.1         | 92.7                        | 89.4                                           |
| 7          | IR30            | IR30      | IRRI   | Major       | 85,963,262  | 23.0                        | 21.3       | 88.2                        | 75.7                                           | 19.8         | 89.9                        | 86.4                                           |
| 8          | GUI630          | Gui630    | CNRRI  | Major       | 90,148,266  | 24.2                        | 22.1       | 89.1                        | 76.7                                           | 19.7         | 90.7                        | 87.2                                           |
| 9          | Minghui63       | MH63      | CNRRI  | Major       | 86,495,846  | 23.2                        | 21.3       | 88.6                        | 76.2                                           | 19.5         | 90.6                        | 87.0                                           |
| 10         | CDR22           | CDR22     | CNRRI  | Descendants | 91,089,560  | 24.4                        | 22.6       | 90.2                        | 78.6                                           | 21.6         | 92.7                        | 89.4                                           |
| 11         | Chenghui047     | CH047     | CNRRI  | Descendants | 90,229,126  | 24.2                        | 22.5       | 90.3                        | 78.9                                           | 21.5         | 92.6                        | 89.4                                           |
| 12         | Fuhui838        | FH838     | CNRRI  | Descendants | 83,219,546  | 22.3                        | 20.8       | 89.7                        | 77.8                                           | 20.3         | 92.1                        | 88.7                                           |
| 13         | Hanghai570      | HH570     | CNRRI  | Descendants | 89,043,808  | 23.9                        | 21.9       | 89.9                        | 77.9                                           | 20.5         | 92.1                        | 88.8                                           |
| 14         | Minghui70       | MH70      | CNRRI  | Descendants | 86,022,882  | 23.0                        | 21.5       | 89.6                        | 77.3                                           | 21.0         | 92.4                        | 89.0                                           |

|    |              |        |       |             |            |      |      |      |      |      |      |      |
|----|--------------|--------|-------|-------------|------------|------|------|------|------|------|------|------|
| 15 | Mianhui725   | MH725  | CNRRI | Descendants | 91,077,382 | 24.4 | 22.3 | 86.1 | 74.7 | 22.4 | 87.1 | 84.0 |
| 16 | Minghui86    | MH86   | CNRRI | Descendants | 90,646,724 | 24.3 | 22.4 | 90.1 | 78.4 | 21.6 | 92.5 | 89.2 |
| 17 | Wanhui88     | WH88   | CNRRI | Descendants | 90,286,724 | 24.2 | 22.7 | 91.5 | 79.6 | 22.6 | 95.2 | 92.0 |
| 18 | 9311         | 9311   | CNRRI | Collateral  | 95,787,192 | 25.7 | 23.7 | 92.5 | 79.9 | 22.3 | 96.5 | 93.2 |
| 19 | IR1544       | IR1544 | CNRRI | Collateral  | 90,450,672 | 24.2 | 22.7 | 91.0 | 79.2 | 22.4 | 95.0 | 91.8 |
| 20 | Shuhui527    | SH527  | CNRRI | Collateral  | 79,846,444 | 21.4 | 19.8 | 88.0 | 76.0 | 19.0 | 90.1 | 86.8 |
| 21 | IR36         | IR36   | IRRI  | Collateral  | 95,179,540 | 25.5 | 23.7 | 88.9 | 76.8 | 23.1 | 91.5 | 88.2 |
| 22 | Chuannong422 | CN422  | CNRRI | Tall        | 83,573,006 | 22.4 | 21.0 | 90.7 | 78.1 | 22.2 | 94.7 | 91.3 |
| 23 | Guangchang13 | GC13   | CNRRI | Tall        | 92,595,026 | 24.8 | 23.1 | 90.3 | 78.4 | 21.3 | 92.4 | 89.2 |
| 24 | Luchang-3    | LC3    | CNRRI | Tall        | 90,073,330 | 24.1 | 22.8 | 90.9 | 79.4 | 22.5 | 93.7 | 90.4 |
| 25 | Nante        | NT     | CNRRI | Tall        | 85,366,722 | 22.9 | 21.6 | 91.6 | 79.4 | 19.7 | 95.5 | 92.1 |
| 26 | Shenglixian  | SLX    | CNRRI | Tall        | 92,941,868 | 24.9 | 23.6 | 90.3 | 78.4 | 23.1 | 92.8 | 89.5 |
| 27 | Tetep        | Tetep  | CNRRI | Tall        | 93,480,914 | 25.0 | 22.8 | 88.8 | 77.2 | 22.3 | 91.2 | 87.9 |
| 28 | Wanlixian    | WLX    | CNRRI | Tall        | 89,342,572 | 23.9 | 22.5 | 90.9 | 78.6 | 22.5 | 93.0 | 89.6 |
| 29 | Zhongnong-4  | ZN4    | CNRRI | Tall        | 89,338,824 | 23.9 | 22.5 | 90.8 | 78.8 | 21.9 | 94.7 | 91.4 |
| 30 | W1543        | W1543  | IRRI  | Wild        | 90,551,852 | 24.3 | 21.7 | 88.9 | 76.9 | 21.2 | 91.9 | 88.6 |

<sup>a</sup> Raw read depth: depth estimated by all sequenced reads

<sup>b</sup> Reliable mapped reads: aligned reads with mapping quality  $\geq 30$

**Table S2. Expected and Observed proportions of Peta and DGWG blocks in IR8, IR24, IR30 and MH63 .**

| Cultivar    | Expected |       | Observed |        |
|-------------|----------|-------|----------|--------|
|             | Peta     | DGWG  | Peta     | DGWG   |
| <b>IR8</b>  | 50.0%    | 50.0% | 38.83%   | 61.17% |
| <b>IR24</b> | 25.0%    | 25.0% | 28.12%   | 42.31% |
| <b>IR30</b> | 26.8%    | 7.7%  | 20.98%   | 26.88% |
| <b>MH63</b> | 13.4%    | 3.9%  | 6.30%    | 7.39%  |

**Table S3. The parents of 8 MH63 descendants.** The information of cultivars was retrieved from CHINA NATIONAL RESEARCH INSTITUTE (CNRRI, <http://www.ricedata.cn/variety/index.htm>)

| Cultivar | Female parent               | Male parent                         |
|----------|-----------------------------|-------------------------------------|
| CDR22    | IR50                        | MH63                                |
| CH047    | IR2588-5-1-2                | MH63                                |
| MH70     | IR54                        | MH63                                |
| MH86     | P18(IR54/MH63//IR60/Gui630) | GK148(Jing187/IR30//MH63)           |
| MH725    | PA64                        | MianHui501(MH63/(TaiYing1Hao/IR26)) |
| HH570    | WL1312/LunHui422            | MH63                                |
| FH838    | 226                         | $\gamma$ 552 <sup>a</sup>           |
| WH88     | WanZhong3                   | 704(Yuai/MH63)/IR1544               |

<sup>a</sup> $\gamma$ 552: Gamma irradiation from MH63.

**Table S4. Expected proportions of MH63 and MH63's blocks from IR30 in 8 MH63 descendants.** The proportion of MH63 blocks inherited from IR30 is 48.99% (=1-51.01%; the proportion in Gui630 is shown in *SI Appendix*, Table S6). Only those blocks of MH63 derived from IR30 could contain ancestral blocks of Peta or DGWG.

| MH63 descendant | Proportion inherited from MH63 | Proportions of MH63 blocks that are inherited from IR30 |
|-----------------|--------------------------------|---------------------------------------------------------|
| CDR22           | 50.0%                          | 24.5%                                                   |
| CH047           | 50.0%                          | 24.5%                                                   |

|       |          |          |
|-------|----------|----------|
| FH838 | 50.0%    | 24.5%    |
| HH570 | 50.0%    | 24.5%    |
| MH70  | 50.0%    | 24.5%    |
| MH725 | 25.0%    | 12.2%    |
| MH86  | 37.5%    | 18.4%    |
| WH88  | 12.5%    | 6.1%     |
| $P^a$ | 3.66E-04 | 1.21E-06 |

<sup>a</sup> P denotes the probability of a block shared by all 8 MH63 descendants.

**Table S5. Number of blocks inherited in a cultivar.**

| Block size               | Cultivar | Chromosome |    |    |    |    |    |    |    |    |    |    |    | Total |
|--------------------------|----------|------------|----|----|----|----|----|----|----|----|----|----|----|-------|
|                          |          | 1          | 2  | 3  | 4  | 5  | 6  | 7  | 8  | 9  | 10 | 11 | 12 |       |
| 10kb $\leq$ size < 400kb | IR8      | 0          | 10 | 17 | 9  | 4  | 11 | 2  | 1  | 1  | 10 | 4  | 13 | 82    |
|                          | IR24     | 1          | 45 | 28 | 16 | 14 | 12 | 18 | 5  | 13 | 6  | 3  | 17 | 178   |
|                          | IR30     | 15         | 21 | 10 | 8  | 10 | 14 | 1  | 20 | 5  | 25 | 24 | 10 | 163   |
|                          | MH63     | 2          | 15 | 15 | 5  | 11 | 2  | 4  | 2  | 6  | 5  | 10 | 10 | 87    |
| size $\geq$ 400kb        | IR8      | 8          | 20 | 17 | 15 | 9  | 11 | 7  | 4  | 4  | 15 | 7  | 12 | 129   |
|                          | IR24     | 4          | 21 | 16 | 15 | 16 | 11 | 19 | 6  | 14 | 7  | 10 | 16 | 155   |
|                          | IR30     | 17         | 13 | 16 | 9  | 10 | 21 | 2  | 11 | 14 | 15 | 14 | 15 | 157   |
|                          | MH63     | 6          | 16 | 16 | 6  | 16 | 6  | 11 | 6  | 12 | 8  | 14 | 14 | 131   |

**Table S6. Length statistics of blocks in MH63 inherited from different ancestors**

| Ancestor | No. of blocks | Total length | Minimum length | Maximum length | Average length | Genome coverage |
|----------|---------------|--------------|----------------|----------------|----------------|-----------------|
| DGWG     | 57            | 27,569,346   | 14,721         | 7,575,570      | 483,673        | 7.39%           |
| Peta     | 59            | 23,515,592   | 13,554         | 2,183,924      | 398,569        | 6.30%           |
| IR24-OP  | 79            | 25,269,808   | 10,918         | 2,210,496      | 319,871        | 6.77%           |
| IR30-OP  | 102           | 41,127,359   | 15,524         | 5,996,696      | 403,209        | 11.02%          |
| Gui630   | 109           | 190,397,494  | 13,104         | 14,327,468     | 1,746,766      | 51.01%          |
| Total    | 408           | 307,045,232  | 10,918         | 14,327,468     | 752,562        | 82.26%          |

**Table S7. Number of Peta and DGWG blocks inherited in a cultivar.** The number of inherited blocks in a cultivar was counted as a whole, no matter how many pieces for a block arose in the next generation. As one large block may be broken into several segments from the parent to an offspring, the number of blocks observed will increase with generations in general.

| Inherited source | Cultivar            | Chromosome |    |    |    |    |    |    |    |    |    |    |    | Total |
|------------------|---------------------|------------|----|----|----|----|----|----|----|----|----|----|----|-------|
|                  |                     | 1          | 2  | 3  | 4  | 5  | 6  | 7  | 8  | 9  | 10 | 11 | 12 |       |
| DGWG             | IR8                 | 4          | 15 | 17 | 12 | 7  | 11 | 4  | 3  | 3  | 13 | 6  | 13 | 108   |
|                  | IR24                | 4          | 29 | 16 | 15 | 12 | 16 | 10 | 6  | 12 | 14 | 3  | 15 | 152   |
|                  | IR30                | 7          | 26 | 14 | 13 | 12 | 16 | 10 | 10 | 10 | 13 | 12 | 10 | 153   |
|                  | MH63                | 3          | 8  | 3  | 2  | 7  | 5  | 2  | 1  | 4  | 7  | 10 | 5  | 57    |
|                  | Shared <sup>a</sup> | 2          | 2  | 0  | 0  | 4  | 0  | 0  | 1  | 0  | 3  | 2  | 1  | 15    |
| Peta             | IR8                 | 4          | 15 | 17 | 12 | 6  | 11 | 5  | 2  | 2  | 12 | 5  | 12 | 103   |
|                  | IR24                | 4          | 17 | 13 | 7  | 9  | 6  | 12 | 1  | 2  | 12 | 4  | 11 | 98    |
|                  | IR30                | 8          | 15 | 11 | 7  | 9  | 2  | 12 | 0  | 2  | 19 | 5  | 11 | 101   |
|                  | MH63                | 2          | 6  | 9  | 1  | 8  | 0  | 7  | 0  | 2  | 14 | 5  | 5  | 59    |
|                  | Shared <sup>a</sup> | 1          | 3  | 0  | 0  | 5  | 0  | 6  | 1  | 0  | 13 | 1  | 0  | 30    |

<sup>a</sup> Shared: the number of inherited blocks in the regions shared by all 8 descendants of MH63.





**Table S8. Details of the blocks in MH63 inherited from DGWG or Peta and the proportion of the segments shared by all 8 MH63 descendants.**

| Inherited source | Chromosome | Blocks <sup>a</sup> | Average length | Total length | Shared length <sup>b</sup> |
|------------------|------------|---------------------|----------------|--------------|----------------------------|
| DGWG             | chr01      | 3                   | 1,236,103      | 3,708,308    | 2,948,707                  |
|                  | chr02      | 8                   | 141,973        | 1,135,787    | 512,080                    |
|                  | chr03      | 3                   | 427,396        | 1,282,189    | -                          |
|                  | chr04      | 2                   | 342,322        | 684,644      | -                          |
|                  | chr05      | 7                   | 377,948        | 2,645,637    | 1,100,465                  |
|                  | chr06      | 5                   | 722,095        | 3,610,477    | -                          |
|                  | chr07      | 2                   | 936,114        | 1,872,228    | -                          |
|                  | chr08      | 1                   | 7,575,570      | 7,575,570    | 1,077,696                  |
|                  | chr09      | 4                   | 184,825        | 739,300      | -                          |
|                  | chr10      | 7                   | 208,271        | 1,457,899    | 276,829                    |
|                  | chr11      | 10                  | 207,410        | 2,074,096    | 85,153                     |
|                  | chr12      | 5                   | 156,642        | 783,211      | 264,366                    |
| Peta             | chr01      | 2                   | 1,271,075      | 2,542,150    | 737,516                    |
|                  | chr02      | 6                   | 185,928        | 1,115,570    | 321,982                    |
|                  | chr03      | 9                   | 349,836        | 3,148,521    | -                          |
|                  | chr04      | 1                   | 859,240        | 859,240      | -                          |
|                  | chr05      | 8                   | 239,757        | 1,918,054    | 1,344,352                  |
|                  | chr07      | 7                   | 688,932        | 4,822,522    | 2,093,665                  |
|                  | chr09      | 2                   | 791,380        | 1,582,760    | 205,138                    |
|                  | chr10      | 14                  | 218,299        | 3,056,183    | 2,773,870                  |
|                  | chr11      | 5                   | 601,649        | 3,008,245    | 1,283,919                  |
|                  | chr12      | 5                   | 292,469        | 1,462,347    | -                          |
| Total            |            | 116                 | 18,015,235     | 51,084,938   | 15,025,738                 |

<sup>a</sup> Blocks: Numbers observed in MH63.

<sup>b</sup> Shared length: the total length of regions shared by all 8 MH63 descendants.

**Table S9. Observed plant height of eight tall varieties in field experiments.** All analyzed varieties were planted in an outdoor field. Plant height was measured at the end of the heading stage. The height of MH63 is provided here as a reference.

| <b>Variety</b> | <b>Plant Height (cm)</b> |
|----------------|--------------------------|
| NT             | 147.2±2.2                |
| WLX            | 167.4±2.3                |
| CN422          | 177.6±1.8                |
| GC13           | 136.2±3.9                |
| LC3            | 164.4±4.0                |
| SLX            | 153.0±2.1                |
| Tetep          | 154.4±4.4                |
| ZN4            | 153.8±3.8                |
| MH63           | 113.0±2.0                |

**Table S10. Detailed information of functionally-unknown gene loci identified under strong artificial selection.** The 123 gene loci listed here correspond to the ones that passed the filtering steps in Fig. 1B. Gene annotations were retrieved from RAP-DB (<http://rapdb.dna.affrc.go.jp/>)

<sup>a</sup> Gene annotations were predicted with the transcript variant in the block. For example, Os01t0266600-01 is a transcript variant of Os01g0266600.

<sup>b</sup> Loci consist of two or more overlapping genes.

| Ancestor | Region                  | Length (bp) | Locus ID                  | Description                                                                                                                                                                                        |
|----------|-------------------------|-------------|---------------------------|----------------------------------------------------------------------------------------------------------------------------------------------------------------------------------------------------|
| DGWG     | chr01:8813485-9679511   | 866027      | Os01g0266600              | Thioredoxin fold domain containing protein. (Os01t0266600-01); <sup>a</sup><br>Thioredoxin fold domain containing protein. (Os01t0266600-02)                                                       |
|          |                         |             | Os01g0266800              | Cystinosin/ERS1p repeat containing protein. (Os01t0266800-01)                                                                                                                                      |
|          |                         |             | Os01g0267050              | Non-protein coding transcript. (Os01t0267050-01)                                                                                                                                                   |
|          |                         |             | Os01g0267100 <sup>b</sup> | MT-A70 family protein. (Os01t0267100-01)                                                                                                                                                           |
| DGWG     | chr01:37602014-39226171 | 1624158     | Os01g0868550              | Hypothetical protein. (Os01t0868550-00)                                                                                                                                                            |
|          |                         |             | Os01g0868600 <sup>b</sup> | Hypothetical conserved gene. (Os01t0868600-01)                                                                                                                                                     |
|          |                         |             | Os01g0877300              | Mitotic checkpoint family protein. (Os01t0877300-01)                                                                                                                                               |
|          |                         |             | Os01g0883900              | Protein of unknown function DUF248, methyltransferase putative family protein. (Os01t0883900-01); Protein of unknown function DUF248, methyltransferase putative family protein. (Os01t0883900-02) |
|          |                         |             | Os01g0884050 <sup>b</sup> | Non-protein coding transcript. (Os01t0884050-00)                                                                                                                                                   |

|  |  |  |                           |                                                                                                                                                                                                                                                                                                                                         |
|--|--|--|---------------------------|-----------------------------------------------------------------------------------------------------------------------------------------------------------------------------------------------------------------------------------------------------------------------------------------------------------------------------------------|
|  |  |  | Os01g0884200              | Hypothetical gene. (Os01t0884200-01)                                                                                                                                                                                                                                                                                                    |
|  |  |  | Os01g0884400              | Armadillo domain containing protein. (Os01t0884400-01)                                                                                                                                                                                                                                                                                  |
|  |  |  | Os01g0884500              | Plus-3 domain containing protein. (Os01t0884500-01)                                                                                                                                                                                                                                                                                     |
|  |  |  | Os01g0884600 <sup>b</sup> | Hypothetical protein. (Os01t0884600-00)                                                                                                                                                                                                                                                                                                 |
|  |  |  | Os01g0885000              | Similar to Cytochrome c. (Os01t0885000-01); Similar to Cytochrome c. (Os01t0885000-02)                                                                                                                                                                                                                                                  |
|  |  |  | Os01g0885200              | Uncharacterised conserved protein UCP031277 domain containing protein. (Os01t0885200-01); Hypothetical conserved gene. (Os01t0885200-02)                                                                                                                                                                                                |
|  |  |  | Os01g0885600              | Alpha/beta hydrolase fold-1 domain containing protein. (Os01t0885600-01)                                                                                                                                                                                                                                                                |
|  |  |  | Os01g0885700              | Protein kinase-like domain containing protein. (Os01t0885700-01)                                                                                                                                                                                                                                                                        |
|  |  |  | Os01g0885900              | Similar to transcriptional factor TINY. (Os01t0885900-00); CGSNL Gene Symbol=ERF17; CGSNL Gene Name=ETHYLENE RESPONSE FACTOR 17; CGSNL Gene Symbol Synonym(s)=OsERF#017, OsERF017, OsERF17, AP2/EREBP#091, AP2/EREBP91; CGSNL Gene Name Synonym(s)=ethylene response factor 17, APETALA2/ethylene-responsive element binding protein 91 |

|      |                         |        |              |                                                                                                                                                                                                                                                                                                                                                  |
|------|-------------------------|--------|--------------|--------------------------------------------------------------------------------------------------------------------------------------------------------------------------------------------------------------------------------------------------------------------------------------------------------------------------------------------------|
|      |                         |        | Os01g0886000 | Protein of unknown function DUF179 family protein. (Os01t0886000-01)                                                                                                                                                                                                                                                                             |
|      |                         |        | Os01g0887700 | Zinc finger, RING/FYVE/PHD-type domain containing protein. (Os01t0887700-01); Similar to Nucleic acid binding protein. (Os01t0887700-02); Similar to Nucleic acid binding protein. (Os01t0887700-03)                                                                                                                                             |
|      |                         |        | Os01g0892500 | Similar to carboxylic ester hydrolase. (Os01t0892500-01)                                                                                                                                                                                                                                                                                         |
|      |                         |        | Os01g0900700 | Similar to predicted protein. (Os01t0900700-00)                                                                                                                                                                                                                                                                                                  |
| DGWG | chr01:39790237-40248758 | 458522 | Os01g0914000 | Conserved hypothetical protein. (Os01t0914000-01)                                                                                                                                                                                                                                                                                                |
|      |                         |        | Os01g0914100 | Plant lipid transfer protein/seed storage/trypsin-alpha amylase inhibitor domain containing protein. (Os01t0914100-00); CGSNL Gene Symbol= ; CGSNL Gene Name= ; CGSNL Gene Symbol Synonym(s)=OsLTPd1; CGSNL Gene Name Synonym(s)=non-specific lipid transfer protein d1, lipid transfer protein d1, type D non-specific lipid transfer protein 1 |
|      |                         |        | Os01g0914200 | Hypothetical protein. (Os01t0914200-01)                                                                                                                                                                                                                                                                                                          |

|      |                         |        |                           |                                                                                                                                                                                                                                                                                                                                                       |
|------|-------------------------|--------|---------------------------|-------------------------------------------------------------------------------------------------------------------------------------------------------------------------------------------------------------------------------------------------------------------------------------------------------------------------------------------------------|
|      |                         |        | Os01g0914300 <sup>b</sup> | Plant lipid transfer protein/seed storage/trypsin-alpha amylase inhibitor domain containing protein. (Os01t0914300-01);CGSNL Gene Symbol= ;CGSNL Gene Name= ;CGSNL Gene Symbol Synonym(s)=OsLTPd2;CGSNL Gene Name Synonym(s)=non-specific lipid transfer protein d2, lipid transfer protein d2, type D non-specific lipid transfer protein 2          |
| Peta | chr01:40248759-40971796 | 723038 | Os01g0925400              | No apical meristem (NAM) protein domain containing protein. (Os01t0925400-01);CGSNL Gene Symbol=NAC41;CGSNL Gene Name=NAC DOMAIN-CONTAINING PROTEIN 41;CGSNL Gene Symbol Synonym(s)=ONAC041, ONAC41, ONAC050, ONAC50;CGSNL Gene Name Synonym(s)=NAC domain-containing protein 041, NAC domain-containing protein 41, NAC domain-containing protein 50 |
|      |                         |        | Os01g0925600              | Conserved hypothetical protein. (Os01t0925600-01)                                                                                                                                                                                                                                                                                                     |
|      |                         |        | Os01g0925700 <sup>b</sup> | Similar to predicted protein. (Os01t0925700-01)                                                                                                                                                                                                                                                                                                       |
|      |                         |        | Os01g0926501              | Non-protein coding transcript. (Os01t0926501-00)                                                                                                                                                                                                                                                                                                      |
|      |                         |        | Os01g0926600              | Similar to Pectin-glucuronyltransferase. (Os01t0926600-01)                                                                                                                                                                                                                                                                                            |
|      |                         |        | Os01g0926800              | Cellular retinaldehyde-binding/triple function, N-terminal domain containing protein. (Os01t0926800-01);CGSNL Gene Symbol= ;CGSNL Gene Name= ;CGSNL Gene Symbol                                                                                                                                                                                       |

|  |  |  |              |                                                                                                                                                                                                                                                                                                                                 |
|--|--|--|--------------|---------------------------------------------------------------------------------------------------------------------------------------------------------------------------------------------------------------------------------------------------------------------------------------------------------------------------------|
|  |  |  |              | Synonym(s)= ;CGSNL Gene Name Synonym(s)=sec14 like protein                                                                                                                                                                                                                                                                      |
|  |  |  | Os01g0927600 | Similar to Auxin response factor 2 (ARF1-binding protein) (ARF1-BP). (Os01t0927600-01);CGSNL Gene Symbol=ARF2;CGSNL Gene Name=AUXIN RESPONSE FACTOR 2;CGSNL Gene Symbol Synonym(s)=OsARF2, OsARF4;CGSNL Gene Name Synonym(s)=auxin response factor-2, auxin response factor 2, auxin response factor-4, auxin response factor 4 |
|  |  |  | Os01g0927900 | Similar to Aspartate kinase precursor (EC 2.7.2.4). (Os01t0927900-01)                                                                                                                                                                                                                                                           |
|  |  |  | Os01g0928100 | Similar to expressed protein. (Os01t0928100-01)                                                                                                                                                                                                                                                                                 |
|  |  |  | Os01g0928200 | Conserved hypothetical protein. (Os01t0928200-00)                                                                                                                                                                                                                                                                               |
|  |  |  | Os01g0928300 | Prefoldin domain containing protein. (Os01t0928300-01)                                                                                                                                                                                                                                                                          |
|  |  |  | Os01g0928600 | Serine palmitoyltransferase. (Os01t0928600-01)                                                                                                                                                                                                                                                                                  |
|  |  |  | Os01g0928700 | Similar to Serine palmitoyltransferase. (Os01t0928700-00)                                                                                                                                                                                                                                                                       |
|  |  |  | Os01g0930300 | RNA-directed DNA polymerase (reverse transcriptase), related domain containing protein. (Os01t0930300-01)                                                                                                                                                                                                                       |



|      |                       |        |              |                                                                                                                                                                                                                                                                     |
|------|-----------------------|--------|--------------|---------------------------------------------------------------------------------------------------------------------------------------------------------------------------------------------------------------------------------------------------------------------|
|      |                       |        | Os01g0930800 | Glycoside hydrolase, family 1 protein. (Os01t0930800-01);CGSNL Gene Symbol=BGLU5;CGSNL Gene Name=BETA-GLUCOSIDASE 5;CGSNL Gene Symbol Synonym(s)=Os1bglu5, Os1Bglu5;CGSNL Gene Name Synonym(s)=beta-glucosidase 5                                                   |
|      |                       |        | Os01g0930900 | Similar to Short chain alcohol dehydrogenase-like. (Os01t0930900-00)                                                                                                                                                                                                |
|      |                       |        | Os01g0931100 | Conserved hypothetical protein. (Os01t0931100-01);Protein of unknown function DUF1624 domain containing protein. (Os01t0931100-02)                                                                                                                                  |
|      |                       |        | Os01g0931400 | Similar to thiamin pyrophosphokinase 1. (Os01t0931400-01);Thiamin pyrophosphokinase, eukaryotic domain containing protein. (Os01t0931400-02);CGSNL Gene Symbol= ;CGSNL Gene Name= ;CGSNL Gene Symbol Synonym(s)=ROX1;CGSNL Gene Name Synonym(s)=Regulator of XA21-1 |
|      |                       |        | Os01g0931600 | Tubby, C-terminal domain containing protein. (Os01t0931600-00)                                                                                                                                                                                                      |
| Peta | chr02:8971712-9219957 | 248246 | Os02g0258800 | Conserved hypothetical protein. (Os02t0258800-01)                                                                                                                                                                                                                   |

|      |                       |       |                           |                                                                                                                                                                                                                                                               |
|------|-----------------------|-------|---------------------------|---------------------------------------------------------------------------------------------------------------------------------------------------------------------------------------------------------------------------------------------------------------|
|      |                       |       | Os02g0258900 <sup>b</sup> | Similar to Molybdopterin biosynthesis CNX2 protein (Molybdenum cofactor biosynthesis enzyme CNX2). (Os02t0258900-01); Similar to CNX2 (COFACTOR OF NITRATE REDUCTASE AND XANTHINE DEHYDROGENASE 2); catalytic. (Os02t0258900-02)                              |
|      |                       |       | Os02g0259100              | Conserved hypothetical protein. (Os02t0259100-01); Similar to predicted protein. (Os02t0259100-02); CGSNL Gene Symbol=IIP2; CGSNL Gene Name=ILA1 INTERACTING PROTEIN 2; CGSNL Gene Symbol Synonym(s)= ; CGSNL Gene Name Synonym(s)=ILA1 interacting protein 2 |
|      |                       |       | Os02g0259850              | Hypothetical gene. (Os02t0259850-00)                                                                                                                                                                                                                          |
|      |                       |       | Os02g0259900              | Conserved hypothetical protein. (Os02t0259900-01)                                                                                                                                                                                                             |
|      |                       |       | Os02g0260000              | Non-protein coding transcript. (Os02t0260000-01)                                                                                                                                                                                                              |
|      |                       |       | Os02g0261100              | Ubiquitin-conjugating enzyme OsUBC5b. (Os02t0261100-01); CGSNL Gene Symbol=UBC5B; CGSNL Gene Name=UBIQUITIN CONJUGATING ENZYME 5B; CGSNL Gene Symbol Synonym(s)=OsUBC5b; CGSNL Gene Name Synonym(s)=Ubiquitin conjugating enzyme 5b                           |
|      |                       |       | Os02g0261150 <sup>b</sup> | Non-protein coding transcript. (Os02t0261150-00)                                                                                                                                                                                                              |
| DGWG | chr05:4172316-4217313 | 44998 | Os05g0169600              | Serine/threonine protein kinase domain containing protein. (Os05t0169600-01)                                                                                                                                                                                  |

|      |                         |         |                           |                                                                                                                                                                                                                                                                                                                          |
|------|-------------------------|---------|---------------------------|--------------------------------------------------------------------------------------------------------------------------------------------------------------------------------------------------------------------------------------------------------------------------------------------------------------------------|
|      |                         |         | Os05g0169700              | Similar to Sugar transporter family protein, expressed. (Os05t0169700-00)                                                                                                                                                                                                                                                |
|      |                         |         | Os05g0169701 <sup>b</sup> | Hypothetical protein. (Os05t0169701-00)                                                                                                                                                                                                                                                                                  |
|      |                         |         | Os05g0169800              | Similar to Carboxyl-terminal proteinase. (Os05t0169800-00)                                                                                                                                                                                                                                                               |
|      |                         |         | Os05g0169900 <sup>b</sup> | Hypothetical gene. (Os05t0169900-01)                                                                                                                                                                                                                                                                                     |
|      |                         |         | Os05g0170200              | Similar to Universal stress protein. (Os05t0170200-01); Similar to universal stress protein family protein. (Os05t0170200-02)                                                                                                                                                                                            |
| Peta | chr05:4772591-5865858   | 1093268 | Os05g0191500              | Similar to stem 28 kDa glycoprotein. (Os05t0191500-01); Similar to Stem 28 kDa glycoprotein. (Os05t0191500-02); Similar to stem 28 kDa glycoprotein. (Os05t0191500-03)                                                                                                                                                   |
|      |                         |         | Os05g0191700              | Similar to Stem 28 kDa glycoprotein. (Os05t0191700-00)                                                                                                                                                                                                                                                                   |
| Peta | chr07:24281836-24713675 | 431840  | Os07g0598100              | Similar to Hydroxyproline-rich glycoprotein DZ-HRGP precursor. (Os07t0598100-01)                                                                                                                                                                                                                                         |
| Peta | chr07:25344163-26086625 | 742463  | Os07g0616500              | Similar to (S)-2-hydroxy-acid oxidase, peroxisomal (EC 1.1.3.15) (Glycolate oxidase) (GOX) (Short chain alpha-hydroxy acid oxidase). (Os07t0616500-01); CGSNL Gene Symbol=GLO4; CGSNL Gene Name=GLYCOLATE OXIDASE 4; CGSNL Gene Symbol Synonym(s)=GLO5, OsGLO5, OsGLO4,; CGSNL Gene Name Synonym(s)=Glycolate oxidase 5, |

|  |  |  |                           |                                                                                                                                                                                                                                                                                                                                                                                               |
|--|--|--|---------------------------|-----------------------------------------------------------------------------------------------------------------------------------------------------------------------------------------------------------------------------------------------------------------------------------------------------------------------------------------------------------------------------------------------|
|  |  |  |                           | Glycolate oxidase 4                                                                                                                                                                                                                                                                                                                                                                           |
|  |  |  | Os07g0616750              | Hypothetical gene. (Os07t0616750-01)                                                                                                                                                                                                                                                                                                                                                          |
|  |  |  | Os07g0616800 <sup>b</sup> | Sucrose synthase 3 (EC 2.4.1.13) (Sucrose-UDP glucosyltransferase 3). (Os07t0616800-01);CGSNL Gene Symbol=RSUS3;CGSNL Gene Name=SUCROSE SYNTHASE 3;CGSNL Gene Symbol Synonym(s)=RSus3(t), SUS3, SS3, OsScS3, RSs3, RSus3, OsSUS3;CGSNL Gene Name Synonym(s)=Rice sucrose synthase-3(t), Sucrose synthase 3, Sucrose-UDP glucosyltransferase 3, Sucrose synthase-3, rice SuSy gene 3           |
|  |  |  | Os07g0617000              | Similar to Ethylene response factor 2. (Os07t0617000-01);Similar to Ethylene response factor 2. (Os07t0617000-02);CGSNL Gene Symbol=ERF65;CGSNL Gene Name=ETHYLENE RESPONSE FACTOR 65;CGSNL Gene Symbol Synonym(s)=OsERF#065, OsERF065, OsERF65, AP2/EREBP#107, AP2/EREBP107;CGSNL Gene Name Synonym(s)=ethylene response factor 65, APETALA2/ethylene-responsive element binding protein 107 |
|  |  |  | Os07g0617600              | Hypothetical conserved gene. (Os07t0617600-01)                                                                                                                                                                                                                                                                                                                                                |

|      |                         |        |              |                                                                                                                                                                                                                                                                     |
|------|-------------------------|--------|--------------|---------------------------------------------------------------------------------------------------------------------------------------------------------------------------------------------------------------------------------------------------------------------|
|      |                         |        | Os07g0617700 | Cyclin-like F-box domain containing protein. (Os07t0617700-01)                                                                                                                                                                                                      |
|      |                         |        | Os07g0618266 | Hypothetical conserved gene. (Os07t0618266-00)                                                                                                                                                                                                                      |
|      |                         |        | Os07g0618450 | Non-protein coding transcript. (Os07t0618450-00)                                                                                                                                                                                                                    |
|      |                         |        | Os07g0619400 | EF-Hand type domain containing protein. (Os07t0619400-01)                                                                                                                                                                                                           |
| Peta | chr10:12931668-13082317 | 150650 | Os10g0391100 | Conserved hypothetical protein. (Os10t0391100-01)                                                                                                                                                                                                                   |
|      |                         |        | Os10g0391200 | Cyclin-like F-box domain containing protein. (Os10t0391200-00)                                                                                                                                                                                                      |
|      |                         |        | Os10g0391300 | DNA-binding SAP domain containing protein.<br>(Os10t0391300-00);CGSNL Gene Symbol=C3H62;CGSNL Gene Name=ZINC FINGER CCCH DOMAIN-CONTAINING PROTEIN 62;CGSNL Gene Symbol Synonym(s)=OsC3H62;CGSNL Gene Name Synonym(s)=Zinc finger CCCH domain-containing protein 62 |
|      |                         |        | Os10g0391400 | Tify domain containing protein. (Os10t0391400-01);CGSNL Gene Symbol=TIFY11E;CGSNL Gene Name=TIFY GENE 11E;CGSNL Gene Symbol Synonym(s)=OsJAZ 13, OsJAZ13,OsTIFY11e;CGSNL Gene Name Synonym(s)=Jasmonate ZIM-domain protein 13                                       |
|      |                         |        | Os10g0391500 | Conserved hypothetical protein. (Os10t0391500-01);Conserved hypothetical protein. (Os10t0391500-02);Conserved hypothetical protein. (Os10t0391500-03);Conserved hypothetical protein.                                                                               |

|      |                         |        |              |                                                                                                                                                                                                                                                                        |
|------|-------------------------|--------|--------------|------------------------------------------------------------------------------------------------------------------------------------------------------------------------------------------------------------------------------------------------------------------------|
|      |                         |        |              | (Os10t0391500-04)                                                                                                                                                                                                                                                      |
|      |                         |        | Os10g0392400 | Tify domain containing protein. (Os10t0392400-01);CGSNL Gene Symbol=TIFY11D;CGSNL Gene Name=TIFY GENE 11D;CGSNL Gene Symbol Synonym(s)=OsTIFY11d, OsJAZ1, OsJAZ 12, OsJAZ12;CGSNL Gene Name Synonym(s)=Jasmonate ZIM-domain protein 1, Jasmonate ZIM-domain protein 12 |
| DGWG | chr10:14904592-14947517 | 42926  | Os10g0422000 | Conserved hypothetical protein. (Os10t0422000-01)                                                                                                                                                                                                                      |
| Peta | chr10:15005837-15814847 | 809011 | Os10g0423400 | Similar to BTB/POZ domain containing protein. (Os10t0423400-00)                                                                                                                                                                                                        |
|      |                         |        | Os10g0423501 | Conserved hypothetical protein. (Os10t0423501-00)                                                                                                                                                                                                                      |
|      |                         |        | Os10g0423800 | Similar to BTB/POZ domain containing protein. (Os10t0423800-00)                                                                                                                                                                                                        |
|      |                         |        | Os10g0423900 | BTB/POZ-like domain containing protein. (Os10t0423900-00)                                                                                                                                                                                                              |
|      |                         |        | Os10g0425400 | BTB/POZ-like domain containing protein. (Os10t0425400-01)                                                                                                                                                                                                              |
|      |                         |        | Os10g0425700 | MATH domain containing protein. (Os10t0425700-00)                                                                                                                                                                                                                      |
|      |                         |        | Os10g0425900 | Kelch related domain containing protein. (Os10t0425900-01)                                                                                                                                                                                                             |
|      |                         |        | Os10g0426100 | Similar to HAT family dimerisation domain containing protein. (Os10t0426100-00)                                                                                                                                                                                        |

|  |  |  |                           |                                                                                                                                                                                                                                                                                                                                                                   |
|--|--|--|---------------------------|-------------------------------------------------------------------------------------------------------------------------------------------------------------------------------------------------------------------------------------------------------------------------------------------------------------------------------------------------------------------|
|  |  |  | Os10g0426300              | Similar to Exonuclease family protein, expressed. (Os10t0426300-00)                                                                                                                                                                                                                                                                                               |
|  |  |  | Os10g0426450 <sup>b</sup> | Hypothetical protein. (Os10t0426450-00)                                                                                                                                                                                                                                                                                                                           |
|  |  |  | Os10g0426600              | Conserved hypothetical protein. (Os10t0426600-01)                                                                                                                                                                                                                                                                                                                 |
|  |  |  | Os10g0426700 <sup>b</sup> | Hypothetical protein. (Os10t0426700-01)                                                                                                                                                                                                                                                                                                                           |
|  |  |  | Os10g0427100              | Conserved hypothetical protein. (Os10t0427100-01)                                                                                                                                                                                                                                                                                                                 |
|  |  |  | Os10g0427300              | Similar to BTB/POZ domain containing protein, expressed. (Os10t0427300-01); Similar to BTB/POZ domain containing protein, expressed. (Os10t0427300-02)                                                                                                                                                                                                            |
|  |  |  | Os10g0430200              | Similar to Sinapyl alcohol dehydrogenase. (Os10t0430200-01); Similar to Sinapyl alcohol dehydrogenase. (Os10t0430200-02); Similar to Sinapyl alcohol dehydrogenase. (Os10t0430200-03); CGSNL Gene Symbol=CAD3; CGSNL Gene Name=CINNAMYL ALCOHOL DEHYDROGENASE 3; CGSNL Gene Symbol Synonym(s)=OsCAD3; CGSNL Gene Name Synonym(s)=Cinnamyl alcohol dehydrogenase 3 |
|  |  |  | Os10g0433200              | Hypothetical conserved gene. (Os10t0433200-00)                                                                                                                                                                                                                                                                                                                    |
|  |  |  | Os10g0435900              | Similar to BTB/POZ domain containing protein. (Os10t0435900-00)                                                                                                                                                                                                                                                                                                   |
|  |  |  | Os10g0436100              | BTB/POZ-like domain containing protein. (Os10t0436100-00)                                                                                                                                                                                                                                                                                                         |

|      |                         |        |              |                                                                                                                                                                                                                                                    |
|------|-------------------------|--------|--------------|----------------------------------------------------------------------------------------------------------------------------------------------------------------------------------------------------------------------------------------------------|
|      |                         |        | Os10g0438300 | Conserved hypothetical protein. (Os10t0438300-00)                                                                                                                                                                                                  |
|      |                         |        | Os10g0438301 | Hypothetical conserved gene. (Os10t0438301-00)                                                                                                                                                                                                     |
| Peta | chr10:21769689-21922126 | 152438 | Os10g0554800 | Plant lipid transfer protein and hydrophobic protein, helical domain containing protein. (Os10t0554800-01)                                                                                                                                         |
|      |                         |        | Os10g0554900 | Protein of unknown function DUF566 family protein. (Os10t0554900-01);Protein of unknown function DUF566 domain containing protein. (Os10t0554900-02)                                                                                               |
|      |                         |        | Os10g0555100 | Similar to DNA chromosome 4, ESSA I CONTIG fragment NO. 6 (Glucosyltransferase like protein). (Os10t0555100-01);CGSNL Gene Symbol= ;CGSNL Gene Name= ;CGSNL Gene Symbol Synonym(s)=OsGGT;CGSNL Gene Name Synonym(s)=glycogenin glucosyltransferase |
|      |                         |        | Os10g0555200 | Resolvase, holliday junction-type, YqgF-like domain containing protein. (Os10t0555200-01)                                                                                                                                                          |
|      |                         |        | Os10g0555300 | Zinc finger, C2H2-like domain containing protein. (Os10t0555300-01)                                                                                                                                                                                |
|      |                         |        | Os10g0555600 | Beta-expansin precursor. (Os10t0555600-01);CGSNL Gene Symbol=EXPB6;CGSNL Gene Name=BETA-EXPANSIN 6;CGSNL Gene Symbol Synonym(s)=OsEXPB6, osaEXPb1.8;CGSNL Gene Name Synonym(s)=Expansin-B6,                                                        |



|  |  |  |                           |                                                                                                                                                                                                                                                          |
|--|--|--|---------------------------|----------------------------------------------------------------------------------------------------------------------------------------------------------------------------------------------------------------------------------------------------------|
|  |  |  |                           | Beta-expansin-6                                                                                                                                                                                                                                          |
|  |  |  | Os10g0555651 <sup>b</sup> | Conserved hypothetical protein. (Os10t0555651-00)                                                                                                                                                                                                        |
|  |  |  | Os10g0555700              | Beta-expansin. (Os10t0555700-02);CGSNL Gene Symbol=EXPB2;CGSNL Gene Name=BETA-EXPANSIN 2;CGSNL Gene Symbol Synonym(s)=OsEXPB2, OsaEXPb1.9;CGSNL Gene Name Synonym(s)=Expansin-B2, Beta-expansin-2                                                        |
|  |  |  | Os10g0555900              | Similar to Beta-expansin. (Os10t0555900-01);Beta-expansin precursor. (Os10t0555900-02);CGSNL Gene Symbol=EXPB3;CGSNL Gene Name=BETA-EXPANSIN 3;CGSNL Gene Symbol Synonym(s)=OsEXPB3, osaEXPb1.10;CGSNL Gene Name Synonym(s)=Expansin-B3, Beta-expansin-3 |
|  |  |  | Os10g0556000 <sup>b</sup> | Hypothetical protein. (Os10t0556000-00)                                                                                                                                                                                                                  |
|  |  |  | Os10g0556100              | Similar to beta-expansin EXPB4. (Os10t0556100-01);Similar to beta-expansin EXPB4. (Os10t0556100-02);Similar to Expansin-B4. (Os10t0556100-03);CGSNL Gene Symbol=EXPB4;CGSNL Gene Name=BETA-EXPANSIN 4;CGSNL Gene Symbol                                  |

|      |                         |       |                           |                                                                                                                                                                                              |
|------|-------------------------|-------|---------------------------|----------------------------------------------------------------------------------------------------------------------------------------------------------------------------------------------|
|      |                         |       |                           | Synonym(s)=OsEXPB4, OsaEXPb1.7;CGSNL Gene Name<br>Synonym(s)=Expansin-B4, Beta-expansin-4                                                                                                    |
|      |                         |       | Os10g0556200              | Hypothetical conserved gene. (Os10t0556200-01);CGSNL Gene Symbol= ;CGSNL Gene Name= ;CGSNL Gene Symbol<br>Synonym(s)=OsbHLH113;CGSNL Gene Name Synonym(s)=basic helix-loop-helix protein 113 |
|      |                         |       | Os10g0556500              | Hypothetical conserved gene. (Os10t0556500-01)                                                                                                                                               |
|      |                         |       | Os10g0556700              | Hypothetical conserved gene. (Os10t0556700-00)                                                                                                                                               |
|      |                         |       | Os10g0556900              | Conserved hypothetical protein. (Os10t0556900-01)                                                                                                                                            |
| Peta | chr10:21992900-22072751 | 79852 | Os10g0558750              | Similar to Oxidoreductase, 2OG-Fe oxygenase family protein, expressed. (Os10t0558750-01)                                                                                                     |
|      |                         |       | Os10g0558801 <sup>b</sup> | Non-protein coding transcript. (Os10t0558801-00)                                                                                                                                             |
|      |                         |       | Os10g0558850              | Hypothetical protein. (Os10t0558850-00)                                                                                                                                                      |
|      |                         |       | Os10g0559200              | Similar to Oxidoreductase, 2OG-Fe oxygenase family protein, expressed. (Os10t0559200-01)                                                                                                     |
|      |                         |       | Os10g0559300              | Hypothetical protein. (Os10t0559300-01)                                                                                                                                                      |

|      |                       |         |                           |                                                                                                                                                      |
|------|-----------------------|---------|---------------------------|------------------------------------------------------------------------------------------------------------------------------------------------------|
|      |                       |         | Os10g0559400 <sup>b</sup> | Similar to cDNA clone:J023138C05, full insert sequence. (Os10t0559400-01); Similar to cDNA clone:J023138C05, full insert sequence. (Os10t0559400-02) |
|      |                       |         | Os10g0559450              | Conserved hypothetical protein. (Os10t0559450-01)                                                                                                    |
|      |                       |         | Os10g0559500 <sup>b</sup> | 2OG-Fe(II) oxygenase domain containing protein. (Os10t0559500-01); 2OG-Fe(II) oxygenase domain containing protein. (Os10t0559500-02)                 |
|      |                       |         | Os10g0559650              | Hypothetical protein. (Os10t0559650-00)                                                                                                              |
|      |                       |         | Os10g0559800              | Protein of unknown function DUF547 domain containing protein. (Os10t0559800-01)                                                                      |
|      |                       |         | Os10g0559833 <sup>b</sup> | Hypothetical protein. (Os10t0559833-00)                                                                                                              |
|      |                       |         | Os10g0559866              | Hypothetical protein. (Os10t0559866-00)                                                                                                              |
|      |                       |         | Os10g0559900 <sup>b</sup> | Ribosomal protein L18/L5 domain containing protein. (Os10t0559900-01)                                                                                |
| Peta | chr11:6540176-7824094 | 1283919 | Os11g0242400              | Similar to Rieske. (Os11t0242400-01)                                                                                                                 |
|      |                       |         | Os11g0242600              | Protein of unknown function DUF579, plant family protein. (Os11t0242600-00)                                                                          |
|      |                       |         | Os11g0242700              | Similar to Ribosomal protein L37. (Os11t0242700-01)                                                                                                  |

|      |                |        |                           |                                                                                                                                                                                                                                           |
|------|----------------|--------|---------------------------|-------------------------------------------------------------------------------------------------------------------------------------------------------------------------------------------------------------------------------------------|
|      |                |        | Os11g0242800              | Similar to ASCAB9-A (ASCAB9-B) (Fragment). (Os11t0242800-01);CGSNL Gene Symbol= ;CGSNL Gene Name= ;CGSNL Gene Symbol Synonym(s)=ASCAB9-A, CP26, Lhcb5;CGSNL Gene Name Synonym(s)=light-harvesting protein ASCAB9-A, PSII CP26, PSII Lhcb5 |
| DGWG | chr12:1-264366 | 264366 | Os12g0100100              | Similar to ALY protein. (Os12t0100100-01);Similar to ALY protein. (Os12t0100100-02);Similar to ALY protein. (Os12t0100100-03)                                                                                                             |
|      |                |        | Os12g0100200 <sup>b</sup> | Conserved hypothetical protein. (Os12t0100200-00)                                                                                                                                                                                         |
|      |                |        | Os12g0102100              | Alcohol dehydrogenase superfamily, zinc-containing protein. (Os12t0102100-01);Similar to predicted protein. (Os12t0102100-02)                                                                                                             |
|      |                |        | Os12g0102200              | LisH dimerisation motif domain containing protein. (Os12t0102200-01)                                                                                                                                                                      |
|      |                |        | Os12g0102300              | Similar to WRKY transcription factor 57. (Os12t0102300-01);CGSNL Gene Symbol=WRKY57;CGSNL Gene Name=WRKY GENE 57;CGSNL Gene Symbol Synonym(s)=OsWRKY57;CGSNL Gene Name Synonym(s)=Rice WRKY gene57                                        |
|      |                |        | Os12g0102350              | Similar to WRKY transcription factor 57. (Os12t0102350-01)                                                                                                                                                                                |

|  |  |  |                                        |                                                                                                                                                                                                              |
|--|--|--|----------------------------------------|--------------------------------------------------------------------------------------------------------------------------------------------------------------------------------------------------------------|
|  |  |  | Os12g0102400                           | Zinc finger, RING/FYVE/PHD-type domain containing protein. (Os12t0102400-01);CGSNL Gene Symbol= ;CGSNL Gene Name= ;CGSNL Gene Symbol Synonym(s)=OsRINGC2-2;CGSNL Gene Name Synonym(s)=RING-C2 type protein 2 |
|  |  |  | Os12g0103000                           | EF-Hand type domain containing protein. (Os12t0103000-01)                                                                                                                                                    |
|  |  |  | Os12g0103150                           | Conserved hypothetical protein. (Os12t0103150-00)                                                                                                                                                            |
|  |  |  | Os12g0103300                           | Preprotein translocase Sec, Sec61-beta subunit domain containing protein. (Os12t0103300-01)                                                                                                                  |
|  |  |  | Os12g0103500                           | Ribosome-inactivating protein domain containing protein. (Os12t0103500-00)                                                                                                                                   |
|  |  |  | <sup>b</sup> Os12g0103540 <sup>b</sup> | Non-protein coding transcript. (Os12t0103540-01)                                                                                                                                                             |
|  |  |  | Os12g0103580                           | Peptidase C48, SUMO/Sentrin/Ubl1 domain containing protein. (Os12t0103580-00)                                                                                                                                |
|  |  |  | Os12g0104250                           | Hypothetical gene. (Os12t0104250-01)                                                                                                                                                                         |
|  |  |  | Os12g0104400                           | Fatty acid desaturase, type 1 domain containing protein. (Os12t0104400-01)                                                                                                                                   |
|  |  |  | Os12g0104700                           | Protein of unknown function DUF231, plant domain containing protein. (Os12t0104700-01)                                                                                                                       |
|  |  |  | Os12g0104733                           | Hypothetical protein. (Os12t0104733-00)                                                                                                                                                                      |

|  |  |  |                           |                                                                                                                                                                                                                               |
|--|--|--|---------------------------|-------------------------------------------------------------------------------------------------------------------------------------------------------------------------------------------------------------------------------|
|  |  |  | Os12g0104766 <sup>b</sup> | Similar to Clathrin heavy chain. (Os12t0104766-00)                                                                                                                                                                            |
|  |  |  | Os12g0104850              | Hypothetical gene. (Os12t0104850-01)                                                                                                                                                                                          |
|  |  |  | Os12g0104900 <sup>b</sup> | EF-HAND 2 domain containing protein.<br>(Os12t0104900-00);CGSNL Gene Symbol=CML26;CGSNL Gene Name=CALMODULIN-LIKE PROTEIN 26;CGSNL Gene Symbol<br>Synonym(s)=OsCML26;CGSNL Gene Name<br>Synonym(s)=calmodulin-like protein 26 |

**Table S11. Expression levels in callus of the 57 genes chosen for the knockout experiment.**

| Expression level <sup>a</sup> | Gene loci with successful knockout |                      | Gene loci with failed knockout | Total |
|-------------------------------|------------------------------------|----------------------|--------------------------------|-------|
|                               | Phenotypic change                  | No phenotypic change |                                |       |
| Low                           | 1                                  | 0                    | 4                              | 5     |
| Medium                        | 5                                  | 3                    | 18                             | 26    |
| High                          | 9                                  | 1                    | 16                             | 26    |
| Total                         | 15                                 | 4                    | 38                             | 57    |

<sup>a</sup> The expression data were retrieved from Genevestigator, a database of microarray expression data. For those loci that were absent in Genevestigator, we used the FPKM values downloaded from 9311 callus RNA-seq data (NCBI, BioProject PRJNA117345, SRR037711~SRR037724). In Genevestigator, RMA (Robust Multi-array Average), is used to summarize probe-level measurements of all arrays to give an estimate expression level, the so-called “average expression value”. The expression levels of genes in all samples are divided into three groups: "LOW", "MEDIUM" or "HIGH". "LOW"(<8.1) corresponds to the first quartile, "MEDIUM"(8.1~11.8) to the interquartile range and "HIGH" (>11.8) to the fourth quartile. The FPKM values were divided to three groups: low (<1), medium (1~10), and high (>10)

**Table S12. Positive control genes and their phenotypic changes when knocked out.** This table lists gRNA, gRNA site, Sanger sequencing data and phenotypic change for 6 positive control genes. The gene *rll4* was not knocked out successfully. All of the five successfully knocked out lines showed phenotypic changes.

| Gene         | Name       | Reported phenotype                   | gRNA <sup>a</sup>    | gRNA sites              | gRNA                | Double Knockout lines /total | Target genotypes in the haplotypes of a mutant detected by Sanger sequencing | Phenotype studied    |                |                    |
|--------------|------------|--------------------------------------|----------------------|-------------------------|---------------------|------------------------------|------------------------------------------------------------------------------|----------------------|----------------|--------------------|
|              |            |                                      |                      |                         |                     |                              |                                                                              | Quantified phenotype | WT measurement | Mutant measurement |
| Os01g0883800 | <i>sd1</i> | Semi-dwarf. Gibberellin biosynthesis | TCGGCCACACGAATGGCTCC | chr01:38382613-38382632 | TCGGCCACACGAATGGCTC | 4/7                          | H1-1:DEL(38382617-38382629);<br>H1-2:SNP(38382615-AGCCA-G) <sup>b</sup>      | Plant height         | 132.4          | 62.8               |
|              |            |                                      |                      |                         |                     |                              | H4-1:DEL(38382617-38382629);<br>H4-2:SNP(38382615-AGCCA-G)                   |                      |                |                    |
|              |            |                                      |                      |                         |                     |                              | H5-1:SNP(38382615-AGCCATTCGTGTGGC-GG);<br>H5-2:IN(38382617-G)                |                      |                |                    |
|              |            |                                      |                      |                         |                     |                              | H6-1:DEL(38382617-38382629);<br>H6-2:SNP(38382615-AGCCA-G)                   |                      |                |                    |
|              |            |                                      |                      |                         |                     |                              | H2-1:WT;                                                                     | No                   | -              | -                  |



|              |                |                                                                                       |                                  |                         |                              |     |                                                         |                   |       |      |  |  |  |
|--------------|----------------|---------------------------------------------------------------------------------------|----------------------------------|-------------------------|------------------------------|-----|---------------------------------------------------------|-------------------|-------|------|--|--|--|
|              |                |                                                                                       |                                  |                         |                              |     | H2-2:WT                                                 | phenotypic change |       |      |  |  |  |
|              |                |                                                                                       |                                  |                         |                              |     | H3-1:WT;<br>H3-2:WT                                     |                   |       |      |  |  |  |
|              |                |                                                                                       |                                  |                         |                              |     | H7-1:WT;<br>H7-2:WT                                     |                   |       |      |  |  |  |
| Os01g0884300 | <i>OsNA C6</i> | Seedling root growth                                                                  | GACCGC<br>CGCTCA<br>TCTCTC<br>TC | chr01:38401360-38401379 | GACCGCCGC<br>TCATCTCTCT<br>C | 2/2 | H1-1:IN(38401361-CCG);<br>H1-2:IN(38401362-T)           | Plant height      | 129.3 | 65.5 |  |  |  |
|              |                |                                                                                       |                                  |                         |                              |     | H3-1:IN(38401361-CCG);<br>H3-2:IN(38401362-T)           |                   |       |      |  |  |  |
| Os05g0170000 | <i>bc10</i>    | Brittle culm. Culm mechanical strength. Cellulose and arabinogalactan protein levels. | GTCCCG<br>CCAGAA<br>CTCTGG<br>TA | chr05:4197196-4197215   | GTCCCGCCA<br>GAACTCTGGT<br>A | 4/4 | H5-1:DEL(4197200-4197221);<br>H5-2:DEL(4197189-4197208) | Plant height      | 130.3 | 47.8 |  |  |  |
|              |                |                                                                                       |                                  |                         |                              |     | H6-1:DEL(4197195-4197199); H6-2:DEL(4197198)            |                   |       |      |  |  |  |
|              |                |                                                                                       |                                  |                         |                              |     | H7-1:DEL(4197200-4197221);<br>H7-2:DEL(4197189-4197208) |                   |       |      |  |  |  |
|              |                |                                                                                       |                                  |                         |                              |     | H8-1:DEL(4197197-4197205);<br>H8-2:DEL(4197199-4197204) |                   |       |      |  |  |  |

|                  |             |                                                                                                    |                                  |                                 |                              |     |                                           |                                         |   |                     |
|------------------|-------------|----------------------------------------------------------------------------------------------------|----------------------------------|---------------------------------|------------------------------|-----|-------------------------------------------|-----------------------------------------|---|---------------------|
| Os05g0<br>187500 | GW5         | Grain size.                                                                                        | TTCCGC<br>AACATG<br>TGGGGA<br>GG | chr05:5365<br>143-536516<br>2   | TTCCGCAACA<br>TGTGGGGAG<br>G | 1/4 | H8-1:IN(5365159-A);<br>H8-2:IN(5365159-G) | Grain size<br>Fig. S8                   | - | -                   |
|                  |             |                                                                                                    |                                  |                                 |                              |     | H9-1:WT;<br>H9-2:WT                       | No<br>phenotypi<br>c change             | - | -                   |
|                  |             |                                                                                                    |                                  |                                 |                              |     | H10-1:WT;<br>H10-2:WT                     |                                         |   |                     |
|                  |             |                                                                                                    |                                  |                                 |                              |     | H11-1:WT;<br>H11-2:WT                     |                                         |   |                     |
| Os10g0<br>558900 | <i>rl14</i> | Leaf rolling.<br>Cellulose<br>and ligin<br>content.<br>Stomata<br>size.<br>Transpiratio<br>n rate. | GGCACG<br>GATAGT<br>AGAACA<br>GT | chr10:2199<br>6026-21996<br>045 | GGCACGGAT<br>AGTAGAACA<br>GT | 0/3 | H1-1:WT;<br>H1-2:WT                       | No<br>phenotypi<br>c change             | - | -                   |
|                  |             |                                                                                                    |                                  |                                 |                              |     | H2-1:WT;<br>H2-2:WT                       |                                         |   |                     |
|                  |             |                                                                                                    |                                  |                                 |                              |     | H3-1:WT;<br>H3-2:WT                       |                                         |   |                     |
| Os02g0<br>260200 | <i>lp</i>   | Panicle<br>branching.<br>Tillering.<br>Culm<br>mechanical                                          | GAGCCT<br>GCGTAA<br>GTGGTA<br>TG | chr02:9043<br>621-904364<br>0   | GAGCCTGCGT<br>AAGTGGTATG     | 1/3 | H1-1:DEL(9043637);<br>H1-2:IN(9043637-A)  | Panicle<br>shape<br>Refer to<br>Fig. S8 |   | Refer to<br>Fig. S8 |

|  |  |           |  |  |  |                     |                     |                             |   |   |
|--|--|-----------|--|--|--|---------------------|---------------------|-----------------------------|---|---|
|  |  | strength. |  |  |  |                     | H2-1:WT;<br>H2-2:WT | No<br>phenotypi<br>c change | - | - |
|  |  |           |  |  |  | H3-1:WT;<br>H3-2:WT |                     |                             |   |   |

<sup>a</sup> gRNAs were designed to bind the 5' region of the coding sequence of the target gene.

<sup>b</sup>H1-1 and H1-2 refer to the two haplotypes of the H1 mutant. The genotype of each haplotype was annotated by comparison with the wild type. WT: wild type. DEL means that this haplotype has a deletion in this region compared to the wild type. IN refers to a insertion at the downstream of the following site and SNP means that there was a single nucleotide variation at the site.

**Table S13. The positions of the 10 randomly sampled genes as the negative controls for the CRISPR knockout experiments.**

| Gene ID      | Adjacent block         | Distance (bp) |
|--------------|------------------------|---------------|
| Os01g0936100 | Peta 40248759 40971796 | 124115        |
| Os05g0375600 | Peta 18169283 18185538 | 39647         |
| Os05g0571300 | Peta 28264741 28350688 | 122880        |
| Os05g0571700 |                        | 139048        |
| Os05g0573600 |                        | 227217        |
| Os10g0341700 | Peta 10158206 10350586 | 63171         |
| Os10g0341750 |                        | 54016         |
| Os10g0342300 |                        | 35306         |
| Os10g0342650 |                        | 35262         |
| Os10g0558400 | Peta 21992900 22072751 | 11874         |

The 10 control genes were randomly selected from within the 300 kb regions from the original Peta ancestor blocks that were shared in all 8 MH63 descendants, ranging from 11874 to 227217 bp. In total, there were 3124 unknown genes near Peta blocks. No observable changes occurred in phenotypes when these genes were knocked out.

**Table S14. Negative control genes and the phenotypic changes in their knockout lines.** This table lists gRNA, gRNA site, Sanger sequencing results and the phenotypic change in the 10 negative control genes.

| Gene ID      | Predicted function                         | gRNA <sup>a</sup>            | gRNA sites              | Double knockout lines /total | Target genotypes in the haplotypes of a mutant detected by Sanger sequencing | Plant height (cm) <sup>c</sup> | WT plant height (cm) |
|--------------|--------------------------------------------|------------------------------|-------------------------|------------------------------|------------------------------------------------------------------------------|--------------------------------|----------------------|
| Os01g0936100 | Similar to Protein kinase.                 | GATAAGGA<br>ACCTCTTG<br>ACTG | chr01:41098121-41098140 | 3/3                          | H6-1:SNP(41098124-41098127-AAGG-T);<br>H6-2:DEL(41098124) <sup>b</sup>       | 130.3                          | 131.5                |
|              |                                            |                              |                         |                              | H7-1:DEL(41098124-41098126);<br>H7-2:DEL(41098125)                           |                                |                      |
|              |                                            |                              |                         |                              | H8-1:DEL(41098124-41098126);<br>H8-2:DEL(41098124-41098126)                  |                                |                      |
| Os05g0375600 | Similar to Peptide chain release factor 2. | TCTTAAGG<br>GTCCGTAC<br>GACA | chr05:18127613-18127632 | 7/7                          | H1-1:DEL(18127629-18127631);<br>H1-2:DEL(18127629)                           | 134.0                          | 132.4                |
|              |                                            |                              |                         |                              | H2-1:DEL(18127629);<br>H2-2:DEL(18127630)                                    |                                |                      |
|              |                                            |                              |                         |                              | H3-1:DEL(18127629);<br>H3-2:DEL(18127631)                                    |                                |                      |
|              |                                            |                              |                         |                              | H4-1:DEL(18127629-18127631);<br>H4-2:DEL(18127629)                           |                                |                      |

|                  |                                                       |                              |                             |     |                                                             |       |       |
|------------------|-------------------------------------------------------|------------------------------|-----------------------------|-----|-------------------------------------------------------------|-------|-------|
|                  |                                                       |                              |                             |     | H5-1:DEL(18127629);<br>H5-2:DEL(18127630)                   |       |       |
|                  |                                                       |                              |                             |     | H6-1:DEL(18127629);<br>H6-2:DEL(18127630)                   |       |       |
|                  |                                                       |                              |                             |     | H7-1:DEL(18127629);<br>H7-2:DEL(18127630)                   |       |       |
| Os05g0571<br>700 | Cyclin-like<br>F-box domain<br>containing<br>protein. | TTGGGTCT<br>GAACACTT<br>CGCT | chr05:28492551-2849<br>2570 | 2/4 | H1-1:DEL(28492551-28492569);<br>H1-2:IN(28492568-G)         | 126.5 | 129.2 |
|                  |                                                       |                              |                             |     | H3-1:DEL(28492551-28492569);<br>H3-2:IN(28492568-G)         |       |       |
|                  |                                                       |                              |                             |     | H2-1:WT;<br>H2-2:WT                                         | 133.5 |       |
|                  |                                                       |                              |                             |     | H4-1:WT;<br>H4-2:WT                                         |       |       |
| Os05g0573<br>600 | Similar to<br>predicted<br>protein.                   | CATGTAGC<br>CCGTGGCC<br>CGCG | chr05:28578326-2857<br>8345 | 2/2 | H1-1:DEL(28578327-28578335);<br>H1-2:DEL(28578330-28578332) | 132.0 | 130.1 |
|                  |                                                       |                              |                             |     | H3-1:DEL(28578329-28578334);<br>H3-2:DEL(28578330-28578332) |       |       |

|                  |                                                                                    |                              |                             |       |                                                                        |       |       |
|------------------|------------------------------------------------------------------------------------|------------------------------|-----------------------------|-------|------------------------------------------------------------------------|-------|-------|
| Os10g0341<br>750 | Hypothetical<br>protein.                                                           | TTTGGTTG<br>CGCATTGC<br>AAAT | chr10:10102678-1010<br>2697 | 2/3   | H2-1:DEL(10102691-10102693);<br>H2-2:DEL(10102689-10102693)            | 134.0 | 130.1 |
|                  |                                                                                    |                              |                             |       | H1-1:DEL(10102677-10102697);<br>H1-2:DEL(10102690-10102695)            |       |       |
|                  |                                                                                    |                              |                             |       | H1-1:DEL(10102677-10102697);<br>H1-2:WT                                | 128.0 |       |
| Os10g0342<br>300 | Serine/threonin<br>e protein<br>kinase-related<br>domain<br>containing<br>protein. | TCCGTAGT<br>GGCATAGC<br>TCGT | chr10:10122833-1012<br>2852 | 18/18 | H13-1:DEL(10122845-10122849)<br>; H13-2:SNP(10122848-CT-A)             | 132.0 | 129.2 |
|                  |                                                                                    |                              |                             |       | H14-1:DEL(10122845-10122849)<br>; H14-2:SNP(10122848-CT-A)             |       |       |
|                  |                                                                                    |                              |                             |       | H15-1:DEL(10122847-10122849)<br>;<br>H153-2:DEL(10122847-1012284<br>9) |       |       |
|                  |                                                                                    |                              |                             |       | H16-1:DEL(10122847-10122849)<br>;<br>H16-2:DEL(10122847-10122849)      |       |       |

|  |  |  |  |  |                                                                   |  |  |
|--|--|--|--|--|-------------------------------------------------------------------|--|--|
|  |  |  |  |  | H17-1:DEL(10122847-10122849)<br>;<br>H17-2:DEL(10122847-10122849) |  |  |
|  |  |  |  |  | H18-1:DEL(10122847-10122850)<br>;<br>H18-2:IN(10122847-A)         |  |  |
|  |  |  |  |  | H2-1:DEL(10122847-10122850);<br>H2-2:IN(10122847-A)               |  |  |
|  |  |  |  |  | H3-1:DEL(10122848-10122849);<br>H3-2:IN(10122847-A)               |  |  |
|  |  |  |  |  | H4-1:DEL(10122847-10122850);<br>H4-2:IN(10122847-A)               |  |  |
|  |  |  |  |  | H7-1:DEL(10122848-10122849);<br>H7-2:IN(10122847-A)               |  |  |
|  |  |  |  |  | H8-1:DEL(10122848-10122849);<br>H8-2:IN(10122847-A)               |  |  |
|  |  |  |  |  | H9-1:DEL(10122848-10122849);<br>H9-2:IN(10122847-A)               |  |  |
|  |  |  |  |  | H10-1:DEL(10122848-10122849)<br>;<br>H10-2:IN(10122847-A)         |  |  |



|                  |                                   |                              |                             |                                                             |                                                             |       |       |
|------------------|-----------------------------------|------------------------------|-----------------------------|-------------------------------------------------------------|-------------------------------------------------------------|-------|-------|
|                  |                                   |                              |                             |                                                             | H11-1:DEL(10122848-10122849)<br>;<br>H11-2:IN(10122847-A)   |       |       |
|                  |                                   |                              |                             |                                                             | H12-1:DEL(10122848-10122849)<br>;<br>H12-2:IN(10122847-A)   |       |       |
|                  |                                   |                              |                             |                                                             | H13-1:DEL(10122848-10122849)<br>;<br>H13-2:IN(10122847-A)   |       |       |
|                  |                                   |                              |                             |                                                             | H14-1:DEL(10122848-10122849)<br>;<br>H14-2:IN(10122847-A)   |       |       |
|                  |                                   |                              |                             |                                                             | H15-1:DEL(10122848-10122849)<br>;<br>H15-2:IN(10122847-A)   |       |       |
| Os10g0341<br>700 | Cellulose<br>synthase-like<br>H1. | TGCAGGA<br>GAGGGTG<br>CCCATC | chr10:10089587-1008<br>9606 | 3/3                                                         | H1-1:DEL(10089601-10089603);<br>H1-2:DEL(10089601-10089605) | 133.0 | 130.2 |
|                  |                                   |                              |                             | H2-1:DEL(10089601-10089602);<br>H2-2:DEL(10089601)          |                                                             |       |       |
|                  |                                   |                              |                             | H3-1:DEL(10089601-10089603);<br>H3-2:DEL(10089601-10089605) |                                                             |       |       |

|                  |                                                                          |                              |                             |     |                                                             |       |       |
|------------------|--------------------------------------------------------------------------|------------------------------|-----------------------------|-----|-------------------------------------------------------------|-------|-------|
| Os05g0571<br>300 | Conserved<br>hypothetical<br>protein.                                    | ATCACCGT<br>GAAATGCA<br>AACG | chr05:28476736-2847<br>6755 | 3/3 | H1-1:DEL(28476752-28476753);<br>H1-2:IN(28476753-AG)        | 134.3 | 132.4 |
|                  |                                                                          |                              |                             |     | H2-1:DEL(28476752-28476753);<br>H2-2:DEL(28476749-28476751) |       |       |
|                  |                                                                          |                              |                             |     | H3-1:DEL(28476752-28476753);<br>H3-2:IN(28476753-AG)        |       |       |
| Os10g0558<br>400 | Similar to<br>Oxidoreductas<br>e, 2OG-Fe<br>oxygenase<br>family protein. | GTCTCCTC<br>GTCTGACG<br>ACAA | chr10:21980728-2198<br>0747 | 2/2 | H1-1:DEL(21980706-21980787);<br>H1-2:DEL(21980737-21980750) | 128.5 | 132.4 |
|                  |                                                                          |                              |                             |     | H2-1:DEL(21980706-21980787);<br>H2-2:DEL(21980737-21980750) |       |       |
| Os10g0342<br>650 | Hypothetical<br>protein.                                                 | ATTGAATC<br>CACTTCGG<br>CTCT | chr10:10121252-1012<br>1271 | 6/6 | H1-1:DEL(10121255-10121258);<br>H1-2:DEL(10121255-10121258) | 131.3 | 131.5 |
|                  |                                                                          |                              |                             |     | H2-1:DEL(10121255-10121257);<br>H2-2:DEL(10121255-10121257) |       |       |
|                  |                                                                          |                              |                             |     | H3-1:DEL(10121255-10121258);<br>H3-2:IN(10121254-T)         |       |       |

|  |  |  |  |  |                                                             |  |  |
|--|--|--|--|--|-------------------------------------------------------------|--|--|
|  |  |  |  |  | H4-1:DEL(10121255-10121256);<br>H4-2:DEL(10121255-10121258) |  |  |
|  |  |  |  |  | H5-1:IN(10121254-TT);<br>H5-2:IN(10121254-TT)               |  |  |
|  |  |  |  |  | H6-1:DEL(10121255-10121256);<br>H6-2:IN(10121254-G)         |  |  |

<sup>a</sup> gRNAs were designed to bind the 5' region of the coding sequence of the target gene;

<sup>b</sup> H1-1 and H1-2 refer to the two haplotypes of the H1 mutant. The genotype of each haplotype was annotated by comparison with the wild type. WT: wild type. DEL means that this haplotype has a deletion on this region relative to the wild type. IN refers to a insertion at the downstream of the following site and SNP means that there was a single nucleotide variation at the site;

<sup>c</sup> No obvious phenotypic changes were observed. Only plant height was measured to compare with the mutants of target genes.

**Table S15. Target gene loci and phenotypic changes in the knockout lines.** This table lists the gRNA, gRNA site, Sanger sequencing results and phenotypic change for each target gene locus. The 20 loci were sampled from the 123 loci with unknown function and all except Os01g884600 were successfully knocked out. For each gene locus, the gRNA was designed to target specific site at the beginning of the CDS region to cause a frame-shift mutation. Then a pair of DNA oligonucleotides with appropriate cloning linkers were synthesized and ligated into the BsaI-digested pRGEB31 vector. Each construct was transformed into callus of Kasalath (*indica*) or Wuyugeng24 (*japonica*). At least 10 transformed individuals were produced in two recipients for each vector. The rice plants were measured under natural field conditions in the Experimental station of Nanjing University. Plant phenotypes were examined every three days against the corresponding wild type plants. For each plant, genomic DNA was extracted from fresh leaves by the CTAB method. Each target region was amplified by PCR and genotyped by Sanger sequencing. Within all our knockout experiments, 82.1% of transgenic plants have a knockout allele and 79.5% have double knockout alleles. Quantification of plant height and heading date are recorded in details.

| Gene locus               | Phenotypes            | gRNA <sup>a</sup>            | gRNA site               | Double knockout lines /total | Genotypes of target regions in the two haplotypes of a mutant detected by Sanger sequencing | Phenotype studied <sup>c</sup> |                |                    |
|--------------------------|-----------------------|------------------------------|-------------------------|------------------------------|---------------------------------------------------------------------------------------------|--------------------------------|----------------|--------------------|
|                          |                       |                              |                         |                              |                                                                                             | Quantified phenotype           | WT measurement | Mutant measurement |
| Os01g0884200             | Dwarf, sterile        | GTCGGTTC<br>AATGCGCA<br>CGTG | chr01:38398664-38398683 | 2/2                          | H1-1:DEL(38398658-38398683)<br>H1-2:IN(38398680-A) <sup>b</sup>                             | Plant height                   | 129.3cm        | 110.7cm            |
|                          |                       |                              |                         |                              | H2-1:DEL(38398658-38398683)<br>H2-2:IN(38398680-A)                                          |                                |                |                    |
| Os01g0884400Os01g0884450 | Late heading, sterile | GATTGCTC<br>CGCAGTTT<br>GCGA | chr01:38412019-38412038 | 3/4                          | H1-1:IN(38412035-A)<br>H1-2:DEL(38412033-38412035)                                          | Heading date                   | 110d           | 143d               |
|                          |                       |                              |                         |                              | H2-1:DEL(38412035)<br>H2-2:IN(38412035-T)                                                   |                                |                |                    |
|                          |                       |                              |                         |                              | H3-1:IN(38412035-A)<br>H3-2:IN(38412035-T)                                                  |                                |                |                    |
|                          |                       |                              |                         |                              | H4-1:WT<br>H4-2:WT                                                                          | No phenotypic change           | -              | -                  |

|                                      |                                     |                              |                             |     |                                                            |                                                              |      |      |
|--------------------------------------|-------------------------------------|------------------------------|-----------------------------|-----|------------------------------------------------------------|--------------------------------------------------------------|------|------|
| Os01g884<br>600                      | No phenotypic change                | GTAAGTAT<br>AAATTCAT<br>CAAG | chr01:384222<br>44-38422263 | 0/3 | H2-1:WT<br>H2-2:WT                                         | No phenotypic change                                         |      |      |
|                                      |                                     |                              |                             |     | H3-1:WT<br>H3-2:WT                                         |                                                              |      |      |
|                                      |                                     |                              |                             |     | H4-1:WT<br>H4-2:WT                                         |                                                              |      |      |
| Os01g088<br>5000                     | Small, growth retard, less tillers  | CATGCCGT<br>CGACAAG<br>GCCGC | chr01:384437<br>77-38443796 | 2/2 | H1-1:DEL(38443794)<br>H1-2:DEL(38443792-38443793)          | Refer to Fig. S8 due to inability to quantitatively describe | -    | -    |
|                                      |                                     |                              |                             |     | H2-1:DEL(38443793-38443794)<br>H2-2:DEL(38443791)          |                                                              |      |      |
| Os01g088<br>6000                     | Late heading, less tillers, sterile | TGACGCGC<br>TGACCGCC<br>AGCT | chr01:384939<br>21-38493940 | 4/4 | H1-1:DEL(38493937)<br>H1-2:DEL(38493932-38493941)          | Heading date                                                 | 110d | 122d |
|                                      |                                     |                              |                             |     | H2-1:DEL(38493937)<br>H2-2:DEL(38493933-38493937)          |                                                              |      |      |
|                                      |                                     |                              |                             |     | H3-1:DEL(38493937)<br>H3-2:DEL(38493933-38493937)          |                                                              |      |      |
|                                      |                                     |                              |                             |     | H4-1:DEL(38493937)<br>H4-2:DEL(38493932-38493941)          |                                                              |      |      |
| Os01g092<br>5600<br>Os01g092<br>5700 | Leaf rolling, shorter panicle       | TATCGGAA<br>GCTGGGG<br>GATCC | chr01:405846<br>44-40584663 | 2/4 | H3-1:DEL(40584659-40584662)<br>H3-2:DEL(40584659-40584662) | Refer to Fig. S8                                             | -    | -    |
|                                      |                                     |                              |                             |     | H4-1:IN(40584659-T)<br>H4-1:IN(40584659-T)                 |                                                              |      |      |

|              |                       |                              |                         |     |                                                                                                                                                                                                                                       |                      |      |      |
|--------------|-----------------------|------------------------------|-------------------------|-----|---------------------------------------------------------------------------------------------------------------------------------------------------------------------------------------------------------------------------------------|----------------------|------|------|
|              |                       |                              |                         |     | H8-1:SNP(40584656-C-T;40584658-C-T)<br>H8-2:SNP(40584656-C-T;40584658-C-T)                                                                                                                                                            |                      |      |      |
|              |                       |                              |                         |     | H6-1:WT<br>H6-2:WT                                                                                                                                                                                                                    | No phenotypic change | -    | -    |
| Os01g0930800 | Late heading, sterile | ATCCGAAG<br>ACGAAATC<br>CTCC | chr01:40842388-40842407 | 4/4 | H1-1:IN(40842402-G)<br>H1-2:DEL(40842403-40842404)<br>H2-1:DEL(40842404-40842405)<br>H2-2:DEL(40842405)<br>H3-1:IN(40842402-G)<br>H3-2:DEL(40842403-40842404)<br>H4-1:IN(40842402-G)<br>H4-2:DEL(40842403-40842404)                   | Heading date         | 110d | 125d |
| Os01g0930900 | No phenotypic change  | CGGCCGCG<br>CCGAACA<br>GCGTC | chr01:40849696-40849715 | 5/7 | H1-1:DEL(40849711-40849712)<br>H1-2:DEL(40849710-40849712)<br>H3-1:IN(40849711-G)<br>H3-2:IN(40849716-CC)<br>H5-1:DEL(40849711-40849712)<br>H5-2:DEL(40849710-40849712)<br>H6-1:DEL(40849711-40849712)<br>H6-2:DEL(40849710-40849712) | No phenotypic change | -    | -    |

|                              |                     |                              |                         |      |                                                            |                           |         |        |
|------------------------------|---------------------|------------------------------|-------------------------|------|------------------------------------------------------------|---------------------------|---------|--------|
|                              |                     |                              |                         |      | H7-1:DEL(40849711-40849712)<br>H7-2:DEL(40849710-40849712) |                           |         |        |
|                              |                     |                              |                         |      | H2-1 : WT<br>H2-2::IN(40849711-G)                          | No phenotypic change      | -       | -      |
|                              |                     |                              |                         |      | H4-1 : WT<br>H4-2::IN(40849711-G)                          |                           |         |        |
| Os10g0555600<br>Os10g0555651 | Dwarf               | GATGGAG<br>CGGTAGTT<br>GGAGT | chr10:21830493-21830512 | 2/2  | H1-1:DEL(21830508-21830509)<br>H1-2:DEL(21830508-21830509) |                           |         |        |
|                              |                     |                              |                         |      | H2-1:DEL(21830508-21830509)<br>H2-2:DEL(21830508-21830509) |                           |         |        |
| Os10g0555900Os10g0556000     | Dwarf, late heading | AGAACGG<br>TAGACGGC<br>CATGG | chr10:21848246-21848265 | 8/12 | H1-1:DEL(21848261-21848262)<br>H1-2:IN(21848262-G)         | Plant height <sup>d</sup> | 132.4cm | 64.6cm |
|                              |                     |                              |                         |      | H2-1:DEL(21848262-21848263)<br>H2-2:DEL(21848262-21848263) |                           |         |        |
|                              |                     |                              |                         |      | H5-1:DEL(21848261-21848262)<br>H5-2:IN(21848262-G)         |                           |         |        |
|                              |                     |                              |                         |      | H6-1:DEL(21848263)<br>H6-2:DEL(21848263)                   | Heading date <sup>d</sup> | 81d     | 90d    |
|                              |                     |                              |                         |      | H10-1:DEL(21848261-21848262)<br>H10-2:IN(21848262-G)       |                           |         |        |
|                              |                     |                              |                         |      | H11-1:DEL(21848261-21848262)                               |                           |         |        |

|                    |                            |                              |                         |     |                                                            |                      |         |        |
|--------------------|----------------------------|------------------------------|-------------------------|-----|------------------------------------------------------------|----------------------|---------|--------|
|                    |                            |                              |                         |     | 48262)<br>H11-2:IN(21848262-G)                             |                      |         |        |
|                    |                            |                              |                         |     | H12-1:DEL(21848261-21848262)<br>H12-2:IN(21848262-G)       |                      |         |        |
|                    |                            |                              |                         |     | H13-1:DEL(21848262)<br>H13-2:IN(21848262-A)                |                      |         |        |
|                    |                            |                              |                         |     | H4-1:WT<br>H4-2:WT                                         | No phenotypic change | -       | -      |
|                    |                            |                              |                         |     | H7-1:WT<br>H7-2:WT                                         |                      |         |        |
|                    |                            |                              |                         |     | H8-1:WT<br>H8-2:WT                                         |                      |         |        |
|                    |                            |                              |                         |     | H9-1:WT<br>H9-2:WT                                         |                      |         |        |
| Os10g0556200       | Dwarf                      | GGGTCGTC<br>CAGATCCC<br>AGCT | chr10:21867486-21867505 | 1/1 | H7-1:DEL(21867498-21867505)<br>H7-2:DEL(21867498-21867505) | Plant height         | 122.1cm | 73.7cm |
| Os10g0556900       | No phenotypic change       | GGAAAAG<br>GTTTCAGG<br>GCCAA | chr10:21909319-21909338 | 2/4 | H2-1:IN(21909335-A)<br>H2-2:IN(21909335-C)                 | No phenotypic change | -       | -      |
|                    |                            |                              |                         |     | H4-1:IN(21909335-A)<br>H4-2:IN(21909335-C)                 |                      |         |        |
|                    |                            |                              |                         |     | H1-1:WT<br>H1-2:WT                                         | No phenotypic change | -       | -      |
| H3-1:WT<br>H3-2:WT |                            |                              |                         |     |                                                            |                      |         |        |
| Os10g0555100       | Dwarf, spike shape change, | CGACGCGC<br>TCATAGTC<br>AACC | chr10:21800366-21800385 | 1/1 | H2-1:DEL(21800381)<br>H2-2:DEL(21800381)                   | Plant height         | 130.1cm | 99.6cm |



|                  |                                             |                              |                             |       |                                                                    |              |         |         |
|------------------|---------------------------------------------|------------------------------|-----------------------------|-------|--------------------------------------------------------------------|--------------|---------|---------|
| Os10g055<br>5200 | Dwarf,<br>sterile                           | GCGTTGGC<br>TCTGACAC<br>TGCG | chr10:218041<br>89-21804208 | 3/4   | H3-1:DEL(21804201-2180<br>4204)<br>H3-2:DEL(21804202-2180<br>4205) | Plant height | 130.3cm | 99.7cm  |
|                  |                                             |                              |                             |       | H4-1:DEL(21804201-2180<br>4204)<br>H4-2:DEL(21804202-2180<br>4205) |              |         |         |
|                  |                                             |                              |                             |       | H6-1:DEL(21804201-2180<br>4204)<br>H6-2:DEL(21804202-2180<br>4205) |              |         |         |
|                  |                                             |                              |                             |       | H8-1:WT<br>H8-2:WT                                                 |              |         |         |
| Os10g055<br>5300 | Dwarf,<br>sterile                           | CGCCGAGC<br>GCCTGGTA<br>CGAC | chr10:218098<br>88-21809907 | 3/4   | H5-1:DEL(21809904)<br>H5-2:DEL(21809904)                           | Plant height | 129.2cm | 105.2cm |
|                  |                                             |                              |                             |       | H6-1:IN(21809904-G)<br>H6-2:IN(21809904-G)                         |              |         |         |
|                  |                                             |                              |                             |       | H7-1:IN(21809904-G)<br>H7-2:IN(21809904-G)                         |              |         |         |
|                  |                                             |                              |                             |       | H4-1:WT<br>H4-2:WT                                                 |              |         |         |
| Os10g055<br>5700 | Sterile                                     | TCCGTGAT<br>GATCACCG<br>TCCT | chr10:218368<br>06-21836825 | 1/1   | H2-1:DEL(21836817-2183<br>6821)<br>H2-2:DEL(21836817-2183<br>6821) | Sterility    | Normal  | Sterile |
| Os10g055<br>6100 | Small,<br>growth<br>retard, leaf<br>rolling | GATTTTGT<br>GAGCCAC<br>ATTGC | chr10:218594<br>41-21859460 | 1/1   | H1-1:IN(21859458-T)<br>H1-2:DEL(21859457)                          | Plant height | 89.4cm  | 60.5cm  |
| Os10g055         | Leaf                                        | GAGCTGTA                     | chr10:219950                | 12/12 | H1-1:DEL(21995082-2199                                             | Plant height | 130.2cm | 117.2cm |

|      |                            |                  |             |  |                                                                                                                                                                                                                                                                                                                                                                                                                                                                                                                                                                                                                                      |  |  |  |
|------|----------------------------|------------------|-------------|--|--------------------------------------------------------------------------------------------------------------------------------------------------------------------------------------------------------------------------------------------------------------------------------------------------------------------------------------------------------------------------------------------------------------------------------------------------------------------------------------------------------------------------------------------------------------------------------------------------------------------------------------|--|--|--|
| 8850 | rolling,<br>dwarf,<br>weak | CACCCACG<br>CCAA | 68-21995087 |  | 5086)<br>H1-2:IN(21995084-C)<br>H2-1:DEL(21995082-2199<br>5086)<br>H2-2:IN(21995084-C)<br>H3-1:DEL(21995082-2199<br>5086)<br>H3-2:IN(21995084-T)<br>H4-1:DEL(21995082-2199<br>5086)<br>H4-2:IN(21995084-T)<br>H5-1:DEL(21995082-2199<br>5086)<br>H5-2:IN(21995084-C)<br>H6-1:DEL(21995082-2199<br>5086)<br>H6-2:IN(21995084-C)<br>H7-1:DEL(21995082-2199<br>5086)<br>H7-2:IN(21995084-T)<br>H8-1:DEL(21995082-2199<br>5086)<br>H8-2:IN(21995084-T)<br>H9-1:DEL(21995082-2199<br>5086)<br>H9-2:IN(21995084-T)<br>H10-1:DEL(21995082-219<br>95086)<br>H10-2:IN(21995084-T)<br>H11-1:DEL(21995082-219<br>95086)<br>H11-2:IN(21995084-T) |  |  |  |
|------|----------------------------|------------------|-------------|--|--------------------------------------------------------------------------------------------------------------------------------------------------------------------------------------------------------------------------------------------------------------------------------------------------------------------------------------------------------------------------------------------------------------------------------------------------------------------------------------------------------------------------------------------------------------------------------------------------------------------------------------|--|--|--|

|                              |                      |                              |                         |     |                                                                                                                                                                                        |                      |   |   |
|------------------------------|----------------------|------------------------------|-------------------------|-----|----------------------------------------------------------------------------------------------------------------------------------------------------------------------------------------|----------------------|---|---|
|                              |                      |                              |                         |     | H12-1:DEL(21995082-21995086)<br>H12-2:IN(21995084-T)                                                                                                                                   |                      |   |   |
| Os10g0559800<br>Os10g0559833 | No phenotypic change | AAAGAAC<br>TACTTCCT<br>GAATA | chr10:22041457-22041476 | 3/3 | H1-1:DEL(22041472-22041481)<br>H1-2:DEL(22041471-22041472)<br>H2-1:DEL(22041472-22041481)<br>H2-2:DEL(22041471-22041472)<br>H3-1:DEL(22041472-22041481)<br>H3-2:DEL(22041471-22041472) | No phenotypic change | - | - |
| Os11g0242400                 | No phenotypic change | CGGCACCA<br>CCAGAGG<br>GTCGT | chr11:7642767-7642786   | 2/2 | H1-1:IN(7642784-T)<br>H1-2:IN(7642784-T)<br>H2-1:IN(7642784-T)<br>H2-2:IN(7642784-T)                                                                                                   | No phenotypic change | - | - |

<sup>a</sup> gRNAs were designed to bind the 5' region of the coding sequence of the target gene locus.

<sup>b</sup> H1-1 and H1-2 refer to the two haplotypes of the H1 mutant. Genotype of each haplotype was annotated by comparison with the wild type. WT: wild type. DEL means that this haplotype has a deletion on this region relative to the wild type. IN refers to an insertion at the downstream of the following site and SNP means that there was a single nucleotide variation at the site.

<sup>c</sup> Plant height was in centimeters and heading date was in days.

<sup>d</sup> All of the 8 double knockout mutants showed both changes in plant height and heading date.

**Table S16. Expression levels in callus of the 26 genes chosen for the knockdown experiment.**

| Expression level <sup>a</sup> | gene loci with successful knockdown |                      | Gene loci with failed knockdown | Total |
|-------------------------------|-------------------------------------|----------------------|---------------------------------|-------|
|                               | Phenotypic change                   | No phenotypic change |                                 |       |
| Low                           | 1                                   | 1                    | 1                               | 3     |
| Medium                        | 3                                   | 2                    | 7                               | 12    |
| High                          | 6                                   | 3                    | 2                               | 11    |
| Total                         | 10                                  | 6                    | 10                              | 26    |

Among the 38 gene loci for which we could not get knockout mutants even after at least two times of transformation, 26 were chosen randomly to construct dCas9 knockdown plasmids to reduce their expression level. Similar to the knockout results, (i) there was still a high percentage (38.5%) of genes for which we could not get knockdown mutants; (ii) there was a high percentage (62.5%) of knockdown genes that exhibited distinctly phenotypic changes and many of them died during seedling. These results are consistent with the possibility that most of these genes are essential.

<sup>a</sup> The expression data were retrieved from Genevestigator, a database of microarray expression data. For those loci that were absent in Genevestigator, we used the FPKM values downloaded from 9311 callus RNA-seq data (NCBI, BioProject PRJNA117345, SRR037711~SRR037724). In Genevestigator, RMA (Robust Multi-array Average), is used to summarize probe-level measurements of all arrays to give an estimate expression level, the so-called “average expression value”. The expression levels of genes in all samples are divided to three groups: "LOW", "MEDIUM" or "HIGH". "LOW"(<8.1) corresponds to the first quartile, "MEDIUM"(8.1~11.8) to the interquartile range and "HIGH" (>11.8) to the fourth quartile. The FPKM values were divided to three groups: low (<1), medium (1~10), and high (>10)

**Table S17. Estimation of crossovers in each cultivar through exchange of blocks larger than 400kb.**

| <b>Cultivar</b> | <b>Chromosome</b> |           |           |           |           |           |           |           |           |           |           |           | <b>All</b> |
|-----------------|-------------------|-----------|-----------|-----------|-----------|-----------|-----------|-----------|-----------|-----------|-----------|-----------|------------|
|                 | <b>1</b>          | <b>2</b>  | <b>3</b>  | <b>4</b>  | <b>5</b>  | <b>6</b>  | <b>7</b>  | <b>8</b>  | <b>9</b>  | <b>10</b> | <b>11</b> | <b>12</b> |            |
| IR8             | 7                 | 13        | 11        | 9         | 6         | 7         | 4         | 2         | 2         | 10        | 4         | 7         | 82         |
| IR24            | 2                 | 15        | 9         | 11        | 9         | 6         | 12        | 4         | 8         | 4         | 6         | 9         | 95         |
| IR30            | 10                | 9         | 9         | 6         | 7         | 16        | 0         | 9         | 10        | 11        | 6         | 8         | 101        |
| MH63            | 3                 | 10        | 8         | 4         | 10        | 3         | 6         | 3         | 5         | 6         | 9         | 8         | 75         |
| <b>Total</b>    | <b>22</b>         | <b>47</b> | <b>37</b> | <b>30</b> | <b>32</b> | <b>32</b> | <b>22</b> | <b>18</b> | <b>25</b> | <b>31</b> | <b>25</b> | <b>32</b> | <b>353</b> |

**Dataset S1. (separate file)**

Full list of identified SNP markers for the IR30-Gui630- MH63 trio.

**Dataset S2. (separate file)**

Identified markers in DGWG-Peta-IR8 inferred or corrected using pedigree information.
